1  
2  
3  
4  
5  
6  
7  
8  
9  
10  
11  
12  
13  
14  
15  
16  
17  
18  
19  
20  
21  
22  
23  
24  
25  
26  
27

# Utilizing a resource of enrichment profiles in plasma for the systematic assessment of antibody selectivity.

Claudia Fredolini<sup>†</sup>, Sanna Byström<sup>†b</sup>, Laura Sanchez-Rivera<sup>†b</sup>, Marina Ioannou<sup>†</sup>, Davide Tamburro<sup>‡</sup>,  
Rui M. Branca<sup>‡</sup>, Peter Nilsson<sup>‡</sup>, Janne Lehtiö<sup>‡</sup> and Jochen M. Schwenk<sup>†,\*</sup>

<sup>†</sup>Affinity Proteomics, Science for Life Laboratory, School of Biotechnology, KTH - Royal Institute of  
Technology, Box 1031, SE-171 21 Solna, Sweden

<sup>‡</sup>Cancer Proteomics, Department of Oncology-Pathology, Science for Life Laboratory, Karolinska  
Institute, Box 1031, SE-171 21 Solna, Sweden

<sup>b</sup> These authors equally contributed to the work

\*Corresponding author:

Jochen M Schwenk, Affinity Proteomics, Science for Life Laboratory, School of Biotechnology, KTH  
- Royal Institute of Technology, Box 1031, 171 21 Solna, Sweden,

E: [jochen.schwenk@scilifelab.se](mailto:jochen.schwenk@scilifelab.se); T: +46 (0)8 790 9869

28 **ABSTRACT**

29 There is a strong need for procedures that enable context and application dependent validation of  
30 antibodies. Here we describe the foundation for a resource aiding more detailed assessment antibody  
31 selectivity for capturing endogenous proteins from human plasma. In 414 immunoprecipitation (IP)  
32 experiments with EDTA plasma, data was generated by mass spectrometry (LC-MS) with 157  
33 antibodies (targeting 120 unique proteins). Out of a total of 1,313 unique proteins, 426 proteins (33%)  
34 were detected in > 20% of the assays and indicate a background comprised of mainly proteins from the  
35 complement system. For all proteins identified either in heat-treated or untreated EDTA plasma,  
36 frequencies of occurrence were derived. We determined z-scores for each IP as a measure of  
37 enrichment to annotate the antibodies into four categories (ON-target, CO-target, OFF-target and NO-  
38 target). For 45% (70/157) of the tested antibodies, the expected target proteins were enriched (z-score  
39  $\geq 3$ ) above background. There were 84% (59/70) of binders that co-enriched other proteins beside the  
40 intended target, either due to OFF-target binding or predicted interactions. Comparing several  
41 antibodies raised against IGFBP2, the established library allowed us to describe protein complexes in  
42 plasma, and we employed multiplexed sandwich immunoassays to confirm these. In summary, the  
43 generated resource of plasma enrichment profiles and background proteins adds a very useful and yet  
44 lacking starting point for the assessment of antibody selectivity in this clinically important body fluid.  
45 The provided insights will contribute to a more informed use of validated affinity reagents and may  
46 lead to further advancements of plasma proteomics assays.

47

48 **MAIN TEXT**

49 Antibodies are important tools used in a wide range of assays within life science, but there is a  
50 growing awareness about the importance to assess the quality of the data generated therewith [1]. To  
51 address this challenge, the recently formed International Working Group for Antibody Validation  
52 (IWGAV) proposed five strategies to assess the experimental performance of antibodies [2]. However,  
53 the opportunities for evaluating antibodies in the given context (= sample type) and application (=  
54 assays) are limited. In particular for body fluids there are currently no tools for modulating the samples  
55 to overexpress or delete expression of a target of interest. While the use of GWAS provides powerful  
56 opportunities to assess the relation between plasma protein abundance and genetic information [3, 4],  
57 affinity reagents are preferably still validated before the intended use. There is further need to  
58 experimentally assess selectivity of the affinity reagents and to enable the development of sensitive  
59 assays and technologies for proteins in plasma or serum.

60

61 Here, we aim to describe the foundation of a resource for the assessment of antibodies used to capture  
62 proteins from plasma. We utilize immunoprecipitation (IP) of full-length proteins in combination with  
63 mass spectrometry (MS) to systematically describe a library of identified proteins. In more than 400  
64 IPs with plasma frequencies of occurrence ( $f$ ) and enrichments scores ( $z$ -scores) were collected, and  
65 we list those proteins that were commonly detected as plasma background. Similar efforts have been  
66 applied to evaluate the performances of antibodies for IP in cell lysates [5]. Apart from few studies  
67 focused on specific, smaller number of targets [6, 7] however, there are no large scale and systematic  
68 studies extensively applying IP of endogenous full-length proteins and MS for antibody validation in  
69 plasma. Otherwise, peptide-specific antibodies to determine protein abundance after digestion of  
70 plasma proteins have been more frequently applied in combination with MS readout [8-10]. Additional  
71 approaches such as iMALDI [11] and MS-based immunoassays [12] complement activities using  
72 protein-enrichment before MS analysis. The composition of the plasma proteome was recently updated  
73 and now lists around 3,500 proteins detectable using MS techniques [13]. Adding further targets to this  
74 list, foster hence to perform deeper quantitative analysis of plasma proteins, and will require large  
75 recourses of validated antibodies. For MS-based techniques, indeed one of the keys is to use  
76 enrichment as a strategy to enhance the sensitivity [14], while purely affinity-based techniques will  
77 greatly benefit from the utility of highly selective binder in multiplexed assay systems [15].

78

## 79 **Study Overview**

80 To establish a plasma-centric resource for selectivity analysis of antibodies, we applied a systematic  
81 approach using 157 antibodies (targeting 120 proteins) and a workflow depicted in **Fig. 1A**. The  
82 assays were built on a previously described procedure, in which antibodies are covalently coupled onto  
83 magnetic polystyrene beads prior to incubation with the sample [16]. The study included binders both  
84 of monoclonal and polyclonal origin and different species. In order to compare the performance of  
85 different antibodies raised against a common antigen, a subset of 25 proteins (21%) were targeted by  
86 more than one antibody (**Supplementary Fig. 1**). The selection of presented targets was driven by  
87 giving priority to antibodies raised against proteins known to be part of the plasma proteome and to be  
88 associated to a disease (**Supplementary Excel Table, sheet: "Selected Targets"**). As described in  
89 **Fig. 1B**, the majority of binders (65%, N=101) were raised against target proteins detected previously  
90 'in plasma' (48% N=75) or annotated as 'extracellular' (17%, N=26), and fewer proteins were  
91 annotated as 'cellular' (36%, N=56). As reference for protein abundance in plasma, we considered the  
92 estimated concentrations found in the 2017 build of the plasma PeptideAtlas [13].

## 93 **Pilot study**

94 In a pilot, we compared the experimental conditions to reach an analytical sensitivity to detect plasma  
95 proteins and to assess the potential to discriminate between specifically captured or frequently  
96 observed proteins (denoted plasma background). A set of antibodies obtained from commercially  
97 available ELISA kits for plasma protein analysis were used to cover a plasma concentration range  
98 between  $\mu\text{g/ml}$  (CRP) to low  $\text{pg/ml}$  (IL1A, see **Supplementary Note 1**). We tested combinations of  
99 different amounts of plasma (30-1000  $\mu\text{l}$ ) as well as increasing amounts of beads (30,000 - 1,000,000)  
100 to assess the detectability of the targets **Supplementary Fig. 2A**. We concluded that 100  $\mu\text{l}$  of plasma  
101 and 500,000 beads were suitable for larger scaled investigations, enabling the detection within  $\mu\text{g/ml}$   
102 and high  $\text{pg/mL}$  (e.g. KLK3 was detected in a pool of plasma obtained by mixing samples from  
103 healthy females and males, see **Supplementary Fig.2B**). For the detection of  $\text{pg/ml}$  plasma proteins,  
104 such as IL1A, the IP may require even larger amounts of sample and beads, which was found less  
105 suitable for large scale efforts (**Supplementary Fig. 2A**).The LFQ intensities from the IPs were used  
106 to calculate z-scores and compare peptides from replicated assays. In the pilot, all the antibody profiles  
107 barely reached an enrichment threshold ( $z\text{-score} \geq 3$ ) when using only this limited set of assays (21) in  
108 the library for data analysis. Utilizing a larger library of plasma IP data, as introduced and described  
109 below, improved the number of expected target proteins with  $z\text{-scores} \geq 3$  (**Supplementary Fig 2B**).

## 110 **Assessing the resource**

111 It is well accepted that MS provides in-depth information about the protein content of a sample,  
112 however hundreds if not thousands of proteins can be identified in a single IP experiment [17]. This  
113 calls for a careful assessment and interpretation of data from IP assays where many other proteins than  
114 the intended target can be identified in the same range of spectral counts or precursor intensities. As

115 described in the context of cell lysates, the necessity to compare the outcome of several experiments,  
116 including negative controls or unrelated antibodies is essential [5, 18, 19]. Mellacheruvu and  
117 colleagues described how lists of background proteins that were obtained from control assays  
118 performed in similar experimental conditions can be used to assess specific enrichments in IPs [18]. In  
119 our case, all the data (not exclusively control IgG) was generated in separate experiments (refer to as  
120 “experimental batches” or “batches”). These sets of data were used to build a larger library of proteins  
121 and annotate these by their frequency of identification ( $f$ ) and enrichment scores ( $z$ ). These then serves  
122 as a resource to assess enrichment profiles of the antibodies. Details on experimental batches and  
123 frequencies for proteins are described in **Supplementary Excel Sheets “Experimental Batches”** and  
124 **“Frequencies of identification”**.

125  
126 We applied MaxLFQ label free quantification to 414 plasma IPs (pIP), a total of 1,313 unique proteins  
127 were identified, excluding variable domains of immunoglobulin for heavy and light chains. The  
128 complete list of proteins can be found in **Supplementary Excel Sheet: “Frequencies of  
129 identification”**. Per IP, about 290 proteins were detected on average. Data was collected from  
130 experiments performed under heat treatment versus not heat conditions, as further discussed below, we  
131 found that the average number of identifications per experiment were slightly higher in heat-treated  
132 plasma ( $300 \pm 97$  in 276 pIPs) compared to untreated plasma ( $283 \pm 97$  in 138 pIPs). For both sample  
133 types, the majority of proteins (66%) were detected in  $f < 20\%$  of all assays (**Fig 1C** and  
134 **Supplementary Excel Sheet: “Frequencies of identification”**). Combining the frequencies of how  
135 many times a protein occurred in each IP, proteins found in  $f > 20\%$  of all assays (denoted ‘frequent’)  
136 were compared with those found in  $f < 20\%$  (denoted as ‘less frequent’). The resulting GO analysis  
137 revealed that terms related to the complement activation and wound healing (GO:0002576,  
138 GO:0006956, GO:0050817, GO:0009611, GO:0007596) were enriched for the frequent proteins  
139 (**Supplementary Excel Sheet: “GO enrichment analysis”**). Other enriched terms for the frequent  
140 proteins were related to lipoprotein and their complexes (GO:1990777, GO:0032994, GO:0034358) as  
141 well as vesicles (GO:0031983, GO:0060205). Further investigations also found a significant  
142 association ( $p\text{-value} < 2 * 10^{-16}$ ) relation between the frequencies and estimated protein abundance in  
143 plasma [13], as well as to sequence coverage (**Fig 1D, Supplementary note 3** and **Supplementary  
144 Figure 3A-B**). Further details on frequency of identification and intensities variates along the  
145 experimental batches can be found in the **Supplementary Figure 4A-B** and **Supplementary Excel  
146 Sheet: “Batches Kruskal Wallis test”**.

#### 147 **Differences between untreated and heat-treated plasma**

148 Previously, we have shown that after heat treatment of plasma samples at  $56^{\circ}\text{C}$ , improved the limit of  
149 detection in plasma profiling assays using antibody bead array [20]. Heat treatment of plasma may  
150 indeed retrieve epitopes and making proteins more accessible to antibody binding, however heat may

151 also affect the sample's composition by causing aggregation and proteins to precipitate. As shown for  
152 all IPs in **Fig. 1C and Supplementary Figure 4A**, heat treatment may influence which proteins are  
153 listed among the common contaminants and their frequencies. When we consider LFQ intensities  
154 instead of frequencies, we observed that in heat-treated samples particularly fibrinogens (FGA, FGB  
155 and FGG) were more abundant (**Supplementary Fig. 5**). Previous observations state that denaturation  
156 of fibrinogen starts at 55°C (two transitions peaks at 57.7°C and 96°C) and particularly affects the D  
157 fragment [21]. In heat-treated samples, the affinity of fibrinogens to plastic surfaces has also been  
158 reported to increase [22]. Via a similar mechanism, fibrinogen's unspecific binding to surfaces of  
159 magnetic beads or to heavy chains of IgG antibodies on the beads may be enhanced [23, 24]. Hence,  
160 heat-induced denaturation of fibrinogen may alter the frequency with which proteins of this family are  
161 identified. Other plasma proteins such as albumin, apolipoproteins (APOB, APOC2, APO2, APOE),  
162 Keratines (KRT1, KRT2, KRT10), Fibulin, Fibronectin 1 or IgM were less frequent among the  
163 common contaminants (see also **Supplementary Excel Sheet: "Frequencies of identification"**).

## 164 **Classification**

165 Extending the use of the library containing common contaminants and frequencies, we aimed at  
166 classifying the antibodies based on their enrichment profiles in plasma. Considering a protein as being  
167 enriched when the LFQ intensity was  $z$ -score  $\geq 3$ , all antibodies were annotated according to the  
168 following categories (**Fig. 3A**):

- 169 • ON-target: when a  $z \geq 3$  was only assigned to the expected target.
- 170 • CO-target: other proteins besides the expected targets were detected with  $z \geq 3$ . Here we will  
171 discuss three sub-categories related to the origin of the additional target.
- 172 • OFF-target: proteins other than the expected targets were enriched with  $z \geq 3$ .
- 173 • NO-target: all detected proteins were classified with  $z < 3$ .

174 Knowing that common plasma background proteins may differ between assays using untreated and  
175 heat-treated plasma, data from the respective assays was analyzed separately and the resulting  $z$ -scores  
176 were combined for the global assessment. For the 157 antibodies, we made 1173 identifications for  
177 681 unique proteins with  $z \geq 3$ . In each of the 414 IPs, we detected about 550 proteins, of which 6-9  
178 proteins were enriched above the threshold. The combined outcome of the analyses is shown in **Table**  
179 **1**, where the classification of 70 out of 157 antibodies (45%) was found supportive by falling into the  
180 ON- or CO-target category. When assessing only those antibodies targeting proteins previously  
181 annotated in plasma, the fraction increased to 61% (46/75). It is noteworthy that annotating antibodies  
182 in non-supportive categories could be due to limited affinity of the antibody, limited assay sensitivity  
183 or absence of the target in the used pools of plasma derived from healthy donors, as well as limited  
184 peptide detectability.

## 185 **ON-target enrichment**

186 Applying IP-MS analysis has been reported to improve the sensitivity of protein quantification [8, 12,  
187 25]. Hence, IP-MS may also be used to detect lower abundant proteins, adding to those that presently  
188 remain more challenging for other MS protocols. Our investigations lead to the identification of 9  
189 extracellular proteins (e.g. CXCL8, TGFA) and 15 cellular proteins (e.g. TP53, CASP2) in plasma, that  
190 were not listed in the plasma PeptideAtlas at the time of our study **Supplementary Excel Sheet:**  
191 **“Antibodies experim. annotation”**. For almost 50 % of the polyclonal antibodies annotated as ON-  
192 or CO-target in our studies, the identified peptides aligned with the sequence of the protein fragments  
193 used to generate the antibodies or Protein Epitope Signature Tags (PrEST) (**Supplementary Fig.1B**).  
194 As previously discussed [26], affinity purification of polyclonal antibodies may bare the risk of co-  
195 eluting the target used as bait on the columns and detecting these by MS. Such passenger proteins or  
196 peptides may consequently simulate the enrichment of an endogenous target. In our case, this would  
197 lead to a false classification of the antibody and may hamper downstream applications. To address this  
198 concern, we analyzed beads with immobilized antibodies for the presence of the protein fragment  
199 antigen that could cause passenger peptides to appear. Out of 42 tested antibodies (among ON-target  
200 or CO-target), only 11 showed the potential presence of passenger proteins (**Supplementary note 4,**  
201 **Supplementary Fig. 6**).

## 202 **CO-target enrichment and sub-categories**

203 Evaluating antibodies in terms of target selectivity, we observed the possibility to study co-  
204 enrichments of proteins (**Figure 3**). This category includes those ON-target enrichments where other  
205 proteins were either enriched due to an interaction with the ON-target or as an OFF-target being  
206 captured by the antibodies alongside the intended target. For the second sub-category, sequence  
207 homology and abundance of the OFF-target could serve as reasons for co-enrichments.

## 208 **CO-target enrichment stemming from related proteins**

209 Besides IGFBP2 discussed further below, examples of the CO-target enrichments with sequence  
210 homology included examples for anti-CCL16 (HPA042909) and anti-SERPINA4 (HPA002869).  
211 These binders respectively enriched additional members of their protein family, CCL18 and  
212 SERPINA6, both sharing sequence homology with the intended target (**Supplementary note 7**). The  
213 proteins CCL16 and CCL18 are estimated to be present at 29 ng/ml and 2 ng/ml levels in human  
214 plasma (Peptide Atlas, 2017), hence the estimated abundance differs from the degrees to which  
215 HPA042909 captured CCL16 ( $z = 10.7$ ) and CCL18 ( $z = 10.1$ ). Both proteins were otherwise rarely  
216 observed in other pIPs ( $f < 4\%$ ), have not been predicted to interact directly (**Supplementary Fig. 7A**)  
217 but share sequence to a 27% homology (**Supplementary Fig. 7B**). In the case of HPA002869, the  
218 antibody enriched SERPINA4 ( $z = 8.2$ ) and SERPINA6 ( $z = 8.1$ ) in heated plasma. Serpins are a large  
219 family of blood proteins highly homolog proteins and no direct integration has been predicted  
220 (**Supplementary Fig. 7C**). SERPINA4 and A6 are estimated to be present at 17 and 41  $\mu\text{g/ml}$  levels



221 and share a 40% sequence similarity (**Supplementary Fig. 7D**). Both were observed in 91%  
222 (SERPINA4) and 59% (SERPINA6) of all conducted pIPs with heat-treated plasma (less frequent in  
223 untreated plasma). A research performed on PIPs, a database of predicted human protein-protein  
224 interactions (<http://www.compbio.dundee.ac.uk/www-pips/index.jsp>, [27]), revealed a predicted  
225 interaction between SERPINA4 and SERPINA6 (total interaction score = 128.0). Further antibodies  
226 with independent epitopes are needed to confirm or to exclude the possibility of interactions between  
227 these proteins, as we did not find literature supporting a physical interaction between them.

### 228 **CO-target enrichment stemming from frequent proteins**

229 In another sub-category, we observed that potential protein-protein interactions may also be described  
230 from more frequently observed proteins that tend to present with z-scores  $< 3$ . Below, we discuss two  
231 examples found for IGM, a protein known to be abundant in plasma. The first example is given by  
232 CD5 antigen-like (CD5L, HPA026432) and its known interactor IGM. Here, CD5L was detected  
233 alongside several immunoglobulins (IGH, IGJ, IGK, IGL, IGM). It is known that CD5L takes part in  
234 inflammatory responses during infections or during the process of atherosclerosis, hence binds to the  
235 Fc region of IgM through its SRCR domains [30]. Further, the immunoglobulin J chain (IGJ) is known  
236 to be required to stabilize the binding of CD5L to IGM, but a direct interaction has not been  
237 experimentally observed [31]. Our data supports the idea that association between CD5L, IGM and  
238 IGJ can occur: Besides CD5L ( $[c] = 5.9 \mu\text{g/ml}$ ;  $z = 5.1$ ), immunoglobulin light chain lambda (IGHV3-  
239 23;  $z = 3.4$ ), kappa (IGKC;  $z = 3.4$ ), IGM ( $z = 2.7$ ) and IGJ ( $z = 2.8$ ). A lower z-score of the co-targets  
240 may also possibly indicate that the antibody is more selective for CD5L and less for the additionally  
241 identified proteins. Considering the abundance of IGM at around 1 mg/ml and that IGM frequently  
242 occurred as contaminant ( $f = 98\%$ ), an increased z-score of IGM in this particular IP may point to a  
243 specific enrichment. The second example is given for a monoclonal antibody raised against fibulin 1  
244 (FBLN1) [32]. This antibody was used in both sample types and enriched 22 proteins in heated and 12  
245 in untreated plasma. Even though FBLN1 is a frequent protein ( $f = 65\%$ ) and abundant protein ( $[c] =$   
246  $34 \mu\text{g/ml}$ ), it was only enriched in heated plasma ( $z = 3.7$ ), while other targets such as CAPZA2,  
247 IL36G and PLK4I were detected in both preparations (**Supplementary Excel Sheet: “Antibodies  
248 against same protein”**). Interestingly, CD5L and IGHM were again found in the same assays, with  
249 comparable enrichment values in heated ( $z = 3.4$  and  $3.3$ ) compared to untreated plasma (both  $z = 2.9$ ).  
250 This could serve as another indication that CD5L and IGHM are present in a complex in plasma.  
251 Further analyses are though needed to determine the mode of co-enrichment, meaning, if the co-target  
252 was enriched due to directly interacting with the on-target or due to be serving as an off-target.

### 253 **Studying protein interaction with paired antibodies**

254 The biologically most interesting sub-category within the CO-target category refers to proteins that co-  
255 identified because they presumably interact with the intended target. We chose a limit in  $z \geq 3$  and  
256 LFQ intensity  $\geq 10^7$  to call potential protein interactions. In general, we observed that most of the



257 consistent identifications (identified in several replicates) were found for LFQ precursor intensities  
258 above this level (**Supplementary Fig. 10**). One such example is given by the pIP using three  
259 antibodies raised against the insulin growth factor binding protein 2 (IGFBP2: HPA077723,  
260 HPA045140, HPA004754) of which the latter two were raised against the same antigen. As shown in  
261 **Fig. 3B** for untreated plasma, HPA077723 and HPA045140 both enriched IGFBP2 ( $[c] = 1.1 \mu\text{g/ml}$ ;  
262  $f=21\%$ ) as well as previously known interactors insulin growth factor 1 (IGF1:  $[c] = 0.46 \mu\text{g/ml}$ ;  $f =$   
263  $18\%$ ;) and IGF2 ( $[c] = 1.6 \mu\text{g/ml}$ ;  $8\%$ ). In addition, the plasma proteins butyrylcholine esterase (BCHE:  
264  $[c] = 11.0 \mu\text{g/ml}$ ;  $f = 18\%$ ;) and the deoxyribose-phosphate aldolase (DERA:  $[c] = 0.5 \text{ ng/ml}$ ;  $f = 7\%$ )  
265 were detected. For BCHE and IGF1, an interaction was indeed previously hypothesized [28, 29]. For  
266 the third binder (HPA004754), IGFBP2 was only enriched upon prior heat treatment plasma (**Fig. 3B**).  
267 This differential performance of antibodies raised against the same antigen (HPA045140,  
268 HPA004754) confirms the necessity to investigate each of the different batches and lots of polyclonal  
269 antibodies.

270  
271 In order to provide further evidence for an interaction between the identified proteins, we conducted  
272 multiplexed sandwich assays. Here, recombinant IGFBP2, IGF1, IGF2 and BCHE were first analyzed  
273 in a concentration dependent manner to confirm assay functionality and target specificity (**Table 2**).  
274 First, EDTA plasma was analyzed in a concentration dependent manner, confirming the selectivity of  
275 the matched antibody pairs (**Supplementary Fig. 11**). Then, we investigated if antibody pairs with  
276 different selectivity revealed plasma concentration dependent results. As shown in **Fig 4**, we found  
277 pairs of antibodies mixed specificity in the following capture-detection configurations: IGFBP2-IGF2,  
278 IGF2-IGFBP2 as well as BCHE-IGFBP2. For IGF1 and IGF2 antibody pairs, it was not possible to  
279 obtain a dilution curve with the respective recombinant proteins in solution, but they were functional  
280 in plasma (**Supplementary Fig. 11 C,D,M,N,and P**). Also, IGF2-IGFBP2 and IGFBP2-IGF1  
281 confirmed the presence of the previously known complex IGFBP2-IGF2 (**Table 2, Fig 4 B-C**).  
282 Antibody pairs for IGFBP2 and BCHE described a sample dilution depended trend with their  
283 corresponding intended recombinant proteins as well as in plasma (**Table 2 and Supplementary Fig.**  
284 **11 A, E,F,H and I**). Since no cross-reactivity was observed towards these two proteins with other  
285 antibodies in the assay (**Table 2**), the functional antibody pair BCHE-IGFBP2 supports the indications  
286 provided by IP that a physical interaction between the two proteins in plasma (**Fig 4A**). An inverted  
287 configuration IGFBP2-BCHE and an assay including also the other IGFBP2 antibody indicating an  
288 interaction (HPA077723, **Fig. 3B**) would further support this observation. However, we acknowledge  
289 that not all antibodies allowed building mixed sandwich pairs and using the chosen assay protocol, and  
290 indeed, HPA004754 and HPA077723 were raised against two different regions of IGFBP2. This could  
291 explain their different performance as capture and detection, above all in the presence of complexes  
292 containing IGFBP2. HPA004754 was though functional as capture and detection antibody both using  
293 heat-treated and untreated plasma for the detection of IGFBP2 and in combination with anti-BCHE

294 **(Supplementary Fig. 11. B and G)**. HPA077723 was though not functional with anti-BCHE either as  
295 a capture or detection antibody, suggesting that the binding of either antibody hinders the other  
296 antibody binding to IGFBP2-BCHE complex. Further investigations are needed to investigate if this  
297 hindrance is due to a proximity of the two binding sites or other steric effects such as epitope  
298 accessibility of a captured complex.

299 More examples of potential protein interactions are provided by those cases in which multiple  
300 antibodies were raised against the same target protein using different antigens. Enriching common  
301 ON-target and CO-targets provides evidence for protein complexes rather than artefacts. Examples are  
302 antibodies targeting FBLN1, or IGF1R (see **Supplementary Excel Sheet: “Antibodies against same  
303 protein”**).

### 304 **OFF-target enrichment category**

305 As a last category, we investigate off-target enrichments. Here, we see the plasma abundance of the  
306 off-target over the intended analyte as a main reason for failing to enrich the expected target. As the  
307 community is starting to acknowledge the fact that the performance of antibodies is indeed sample  
308 context and application dependent, certifying off-target interactions may still allow generating novel  
309 hypotheses given that these are followed-up and thoroughly validated by appropriate targeted analysis.  
310 One example for selective off-target interactions in plasma is presented by the antibody HPA004920,  
311 raised against MMP1 (Matrix metalloproteinase 1). We classified this antibody as OFF-target in  
312 untreated plasma because it enriched Mannose-binding protein C (MBL2;  $z = 8.3$ ;  $f=12\%$ ) as well as  
313 MMP3 ( $z = 6.8$ ;  $f=6\%$ ) in the IP assays (Figure 2C). As described above for CCL16 and SERPINA4,  
314 also here a 53% sequences similarity between the intended target (MMP1) and the off-target (MMP3)  
315 **(Supplementary Fig. 7F)** exists and an interaction between these two proteins has been predicted  
316 **(Supplementary Fig. 7E)**. The other off-target MBL2 and MMP1 have only a 10% sequence  
317 similarity **(Supplementary Fig. 7G)**. MBL2 is though estimated to be present at 1.7  $\mu\text{g/ml}$  in  
318 circulation, it is almost 1000x more abundant than MMP1 ( $[c] = 1.1 \text{ ng/ml}$ ) and MMP3 ( $[c] = 0.5$   
319  $\text{ng/ml}$ ) [14]. MBL2 has also been described in to reside in a complex with the serine protease MASP  
320 (MBL-associated serine protease) [31], and its collagen-like domain may serve as a substrate for  
321 matrix metalloproteinases (MMPs) to nest in. Studies on MBL mutations suggest that MMPs may be  
322 involved in physiological regulation of MBL levels [32]. This could eventually explain the presence of  
323 MBL2-MMP3 complexes in plasma.

### 324 **Conclusion**

325 In summary, this study describes a resource that was built from our interest in the verification of  
326 antibodies selectivity in plasma. The antibodies analyzed in this study include polyclonal and  
327 monoclonal that was used for exploratory bead arrays and the development of immunoassays, where  
328 either heat-treated or untreated plasma may serve as samples. We have conducted  $> 400$  IP assays in  
329 plasma and built a library of proteins with their frequencies of identification in plasma. Constructed on

330 the systematic analysis of 157 antibodies, we described the occurrence of common proteins, denoted  
331 plasma background, which allowed us to determine the selectively captured endogenous plasma  
332 proteins by mean of z-scores analysis. Our approach, which we also compared with Western blot  
333 (**Supplementary note 5** and **Supplementary Table 1**), could serve as a valuable method to narrow  
334 large numbers of antibodies determining which ones could enrich the endogenous protein of interest  
335 and to further investigate assay selectivity as well as proteins interactions.

336

337 This concept may though not yet elucidate (i) if the antibodies bind to proteins at full-length or  
338 fragments, (ii) if the antibodies will be functional in pairs in sandwich assay, (iii) how potential protein  
339 interactors and off-targets would compete with on-target binding, (iv) how contaminations from  
340 passenger antigens affect the assay's selectivity and sensitivity. For ON-target and CO-target  
341 antibodies, thus further investigations are required to clarify the technical aspects mentioned above and  
342 to expand on the biological implication of protein interactions in plasma. Nevertheless, pIP is an  
343 informative first test for the identification of pair antibodies with different target proteins to study  
344 protein complexes in plasma by sandwich assays. While, targeted fit-for-purpose experiment should  
345 then include dose response curve in dilutions of plasma, preferentially coupled to quantitative mass  
346 spectrometry analysis for a set of identified peptides including potential co-targets and/or  
347 contaminants.

348

349 The provided resource builds one foundation towards a more detailed assessment of antibodies for  
350 plasma proteomics assays, and may contribute to the development and application of more specific,  
351 robust and reliable immunoassays that can use mass spectrometry or other means of detection [1].

352

353

354 **MATERIAL AND METHODS**

355 Methods are available in the online version of the paper.

356 **AUTHOR CONTRIBUTIONS**

357 CF and JMS initiated, designed, and led the study with the scientific contribution and support from all  
358 co-authors. CF designed the IP experiments and performed the data analysis. CF, SB, LSR and MI  
359 executed the IP experiments with support from DT and RMB. LSR conducted the immunoassays. JL  
360 provided MS infrastructure. The study was supervised by PN, JL and JMS. CF and JMS wrote the  
361 manuscript with input from all authors.

362 **ACKNOWLEDGMENTS**

363 We greatly thank Mathias Uhlén, Fredrik Edfors, Björn Forström, Lucia Lourido, Gabriella Tekin and  
364 the Biobank profiling, Affinity Proteomics and Clinically Applied Proteomics groups at SciLifeLab in  
365 Stockholm for their continuous fruitful discussion, access to instrumentation and input to the presented  
366 work. We also thank everyone at the Human Protein Atlas for their support, and thank Hanna Tegel,  
367 Johan Rockberg and their team for recombinant proteins. The KTH Center for Applied Precision  
368 Medicine (KCAP) funded by the Erling-Persson Family Foundation is acknowledged for financial  
369 support. This work was supported by grants for Science for Life Laboratory, the Knut and Alice  
370 Wallenberg Foundation. The work leading to this publication has received support from the Innovative  
371 Medicines Initiative Joint under grant agreement n°115317 (DIRECT), resources of which are  
372 composed of financial contribution from the European Union's Seventh Framework Programme  
373 (FP7/2007-2013) and EFPIA companies' in-kind contribution. Funding from the Swedish Foundation  
374 for Strategic Research, Swedish Cancer Society and Swedish Research Council is gratefully  
375 acknowledged.

376 **COMPETING FINANCIAL INTERESTS**

377 The authors have no conflicts of interest.

378

379

380 **ABBREVIATIONS:**

|     |                 |                                |
|-----|-----------------|--------------------------------|
| 381 | <b>HPA</b>      | Human Protein Atlas            |
| 382 | <b>LFQ</b>      | label free quantification      |
| 383 | <b>PrEST</b>    | Protein Epitope Signature Tags |
| 384 | <b>Z</b>        | z-score                        |
| 385 | <b><i>f</i></b> | frequency of occurrence        |

386

387

388

## 389 REFERENCES

- 390 1. Baker M. Reproducibility crisis: Blame it on the antibodies. *Nature*.  
391 2015;521(7552):274-6. doi: 10.1038/521274a. PubMed PMID: 25993940.
- 392 2. Uhlen M, Bandrowski A, Carr S, Edwards A, Ellenberg J, Lundberg E, et al. A proposal  
393 for validation of antibodies. *Nat Methods*. 2016;13(10):823-7. doi: 10.1038/nmeth.3995. PubMed  
394 PMID: 27595404.
- 395 3. Folkersen L, Fauman E, Sabater-Lleal M, Strawbridge RJ, Franberg M, Sennblad B, et  
396 al. Mapping of 79 loci for 83 plasma protein biomarkers in cardiovascular disease. *PLoS Genet*.  
397 2017;13(4):e1006706. doi: 10.1371/journal.pgen.1006706. PubMed PMID: 28369058; PubMed  
398 Central PMCID: PMC5393901.
- 399 4. Suhre K, Arnold M, Bhagwat AM, Cotton RJ, Engelke R, Raffler J, et al. Connecting  
400 genetic risk to disease end points through the human blood plasma proteome. *Nature communications*.  
401 2017;8:14357. doi: 10.1038/ncomms14357. PubMed PMID: 28240269; PubMed Central PMCID:  
402 PMC5333359.
- 403 5. Marcon E, Jain H, Bhattacharya A, Guo H, Phanse S, Pu S, et al. Assessment of a  
404 method to characterize antibody selectivity and specificity for use in immunoprecipitation. *Nat*  
405 *Methods*. 2015. doi: 10.1038/nmeth.3472. PubMed PMID: 26121405.
- 406 6. Korbakis D, Brinc D, Schiza C, Soosaipillai A, Jarvi K, Drabovich AP, et al.  
407 Immunocapture-Selected Reaction Monitoring Screening Facilitates the Development of ELISA for  
408 the Measurement of Native TEX101 in Biological Fluids. *Mol Cell Proteomics*. 2015;14(6):1517-26.  
409 doi: 10.1074/mcp.M114.047571. PubMed PMID: 25813379; PubMed Central PMCID: PMC4458717.
- 410 7. Korbakis D, Prassas I, Brinc D, Batruch I, Krastins B, Lopez MF, et al. Delineating  
411 monoclonal antibody specificity by mass spectrometry. *J Proteomics*. 2015;114:115-24. doi:  
412 10.1016/j.jprot.2014.11.004. PubMed PMID: 25462431.
- 413 8. Anderson NL, Anderson NG, Haines LR, Hardie DB, Olafson RW, Pearson TW. Mass  
414 spectrometric quantitation of peptides and proteins using Stable Isotope Standards and Capture by  
415 Anti-Peptide Antibodies (SISCAPA). *J Proteome Res*. 2004;3(2):235-44. PubMed PMID: 15113099.
- 416 9. Anderson NL, Jackson A, Smith D, Hardie D, Borchers C, Pearson TW. SISCAPA  
417 peptide enrichment on magnetic beads using an in-line bead trap device. *Mol Cell Proteomics*.  
418 2009;8(5):995-1005. doi: 10.1074/mcp.M800446-MCP200. PubMed PMID: 19196707; PubMed  
419 Central PMCID: PMC2689780.
- 420 10. Ippoliti PJ, Kuhn E, Mani DR, Fagbami L, Keshishian H, Burgess MW, et al.  
421 Automated Microchromatography Enables Multiplexing of Immunoaffinity Enrichment of Peptides to  
422 Greater than 150 for Targeted MS-Based Assays. *Anal Chem*. 2016;88(15):7548-55. doi:  
423 10.1021/acs.analchem.6b00946. PubMed PMID: 27321643.



- 424 11. Li H, Popp R, Frohlich B, Chen MX, Borchers CH. Peptide and Protein Quantification  
425 Using Automated Immuno-MALDI (iMALDI). *Journal of visualized experiments : JoVE*. 2017;(126).  
426 doi: 10.3791/55933. PubMed PMID: 28872133.
- 427 12. Krastins B, Prakash A, Sarracino DA, Nedelkov D, Niederkofler EE, Kiernan UA, et al.  
428 Rapid development of sensitive, high-throughput, quantitative and highly selective mass spectrometric  
429 targeted immunoassays for clinically important proteins in human plasma and serum. *Clin Biochem*.  
430 2013;46(6):399-410. doi: 10.1016/j.clinbiochem.2012.12.019. PubMed PMID: 23313081; PubMed  
431 Central PMCID: PMCPMC3779129.
- 432 13. Schwenk JM, Omenn GS, Sun Z, Campbell DS, Baker MS, Overall CM, et al. The  
433 Human Plasma Proteome Draft of 2017: Building on the Human Plasma PeptideAtlas from Mass  
434 Spectrometry and Complementary Assays. *J Proteome Res*. 2017. doi:  
435 10.1021/acs.jproteome.7b00467. PubMed PMID: 28938075.
- 436 14. Fredolini C, Bystrom S, Pin E, Edfors F, Tamburro D, Iglesias MJ, et al.  
437 Immunocapture strategies in translational proteomics. *Expert Rev Proteomics*. 2016;13(1):83-98. doi:  
438 10.1586/14789450.2016.1111141. PubMed PMID: 26558424; PubMed Central PMCID:  
439 PMCPMC4732419.
- 440 15. Ayoglu B, Haggmark A, Neiman M, Igel U, Uhlen M, Schwenk JM, et al. Systematic  
441 antibody and antigen-based proteomic profiling with microarrays. *Expert Rev Mol Diagn*.  
442 2011;11(2):219-34. doi: 10.1586/erm.10.110. PubMed PMID: 21405972.
- 443 16. Neiman M, Fredolini C, Johansson H, Lehtio J, Nygren PA, Uhlen M, et al. Selectivity  
444 analysis of single binder assays used in plasma protein profiling. *Proteomics*. 2013;13(23-24):3406-10.  
445 doi: 10.1002/pmic.201300030. PubMed PMID: 24151238.
- 446 17. ten Have S, Boulon S, Ahmad Y, Lamond AI. Mass spectrometry-based immuno-  
447 precipitation proteomics - the user's guide. *Proteomics*. 2011;11(6):1153-9. doi:  
448 10.1002/pmic.201000548. PubMed PMID: 21365760; PubMed Central PMCID: PMCPMC3708439.
- 449 18. Mellacheruvu D, Wright Z, Couzens AL, Lambert JP, St-Denis NA, Li T, et al. The  
450 CRAPome: a contaminant repository for affinity purification-mass spectrometry data. *Nat Methods*.  
451 2013;10(8):730-6. doi: 10.1038/nmeth.2557. PubMed PMID: 23921808; PubMed Central PMCID:  
452 PMCPMC3773500.
- 453 19. Keilhauer EC, Hein MY, Mann M. Accurate Protein Complex Retrieval by Affinity  
454 Enrichment Mass Spectrometry (AE-MS) Rather than Affinity Purification Mass Spectrometry (AP-  
455 MS). *Mol Cell Proteomics*. 2015;14(1):120-35. doi: 10.1074/mcp.M114.041012. PubMed PMID:  
456 25363814; PubMed Central PMCID: PMC4288248.
- 457 20. Schwenk JM, Igel U, Neiman M, Langen H, Becker C, Bjartell A, et al. Toward next  
458 generation plasma profiling via heat-induced epitope retrieval and array-based assays. *Mol Cell*  
459 *Proteomics*. 2010;9(11):2497-507. Epub 2010/08/05. doi: 10.1074/mcp.M110.001560. PubMed  
460 PMID: 20682762; PubMed Central PMCID: PMC2984230.

- 461 21. Chen Y, Mao H, Zhang X, Gong Y, Zhao N. Thermal conformational changes of  
462 bovine fibrinogen by differential scanning calorimetry and circular dichroism. *Int J Biol Macromol.*  
463 1999;26(2-3):129-34. PubMed PMID: 10517519.
- 464 22. Marx G, Mou X, Hotovely-Salomon A, Levdansky L, Gaberman E, Belenky D, et al.  
465 Heat denaturation of fibrinogen to develop a biomedical matrix. *J Biomed Mater Res B Appl*  
466 *Biomater.* 2008;84(1):49-57. doi: 10.1002/jbm.b.30842. PubMed PMID: 17471522.
- 467 23. Boehm TK, Sojar H, Denardin E. Concentration-dependent effect of fibrinogen on IgG-  
468 specific antigen binding and phagocytosis. *Cell Immunol.* 2010;263(1):41-8. Epub 2010/02/24. doi:  
469 10.1016/j.cellimm.2010.02.014. PubMed PMID: 20303075; PubMed Central PMCID:  
470 PMCPMC2862818.
- 471 24. Boehm TK, DeNardin E. Fibrinogen binds IgG antibody and enhances IgG-mediated  
472 phagocytosis. *Hum Antibodies.* 2008;17(3-4):45-56. PubMed PMID: 19029661.
- 473 25. Katafuchi T, Esterházy D, Lemoff A, Ding X, Sondhi V, Kliewer SA, et al. Detection  
474 of FGF15 in plasma by stable isotope standards and capture by anti-peptide antibodies and targeted  
475 mass spectrometry. *Cell Metab.* 2015;21(6):898-904. doi: 10.1016/j.cmet.2015.05.004. PubMed  
476 PMID: 26039452; PubMed Central PMCID: PMCPMC4454892.
- 477 26. Whiteaker JR, Zhao L, Abbatiello SE, Burgess M, Kuhn E, Lin C, et al. Evaluation of  
478 large scale quantitative proteomic assay development using peptide affinity-based mass spectrometry.  
479 *Mol Cell Proteomics.* 2011;10(4):M110 005645. doi: 10.1074/mcp.M110.005645. PubMed PMID:  
480 21245105; PubMed Central PMCID: PMCPMC3069346.
- 481 27. McDowall MD, Scott MS, Barton GJ. PIPs: human protein-protein interaction  
482 prediction database. *Nucleic Acids Res.* 2009;37(Database issue):D651-6. Epub 2008/11/06. doi:  
483 10.1093/nar/gkn870. PubMed PMID: 18988626; PubMed Central PMCID: PMCPMC2686497.
- 484 28. Jara M, Schulz A, Malinowski M, Puhl G, Lock JF, Seehofer D, et al. Growth  
485 hormone/insulin-like growth factor 1 dynamics in adult living donor liver transplantation. *Liver*  
486 *Transpl.* 2014;20(9):1118-26. Epub 2014/08/04. doi: 10.1002/lt.23922. PubMed PMID: 24889799.
- 487 29. Durrant AR, Tamayev L, Anglister L. Serum cholinesterases are differentially regulated  
488 in normal and dystrophin-deficient mutant mice. *Front Mol Neurosci.* 2012;5:73. Epub 2012/06/19.  
489 doi: 10.3389/fnmol.2012.00073. PubMed PMID: 22723768; PubMed Central PMCID:  
490 PMCPMC3378013.
- 491 30. Arai S, Maehara N, Iwamura Y, Honda S, Nakashima K, Kai T, et al. Obesity-  
492 associated autoantibody production requires AIM to retain the immunoglobulin M immune complex  
493 on follicular dendritic cells. *Cell Rep.* 2013;3(4):1187-98. Epub 2013/04/04. doi:  
494 10.1016/j.celrep.2013.03.006. PubMed PMID: 23562157.
- 495 31. Sanjurjo L, Aran G, Roher N, Valledor AF, Sarrias MR. AIM/CD5L: a key protein in  
496 the control of immune homeostasis and inflammatory disease. *J Leukoc Biol.* 2015;98(2):173-84.  
497 Epub 2015/06/05. doi: 10.1189/jlb.3RU0215-074R. PubMed PMID: 26048980.

498 32. Neiman M, Hedberg JJ, Donnes PR, Schuppe-Koistinen I, Hanschke S, Schindler R, et  
499 al. Plasma profiling reveals human fibulin-1 as candidate marker for renal impairment. *J Proteome*  
500 *Res.* 2011;10(11):4925-34. doi: 10.1021/pr200286c. PubMed PMID: 21888404.  
501

## FIGURES & TABLES

**Figure 1A: Workflow and study overview:** A set of 157 antibodies targeting 120 genes were covalently coupled to magnetic beads and incubated one-by-one with EDTA plasma. Two to four replicate incubations were performed for each antibody. Following target enrichment, washing and digestion on beads, the obtained data files from LC-MS were searched and normalized by MaxLFQ, z-score analysis was performed to rank proteins specifically enriched by each antibody. Using the resource generated by > 400 IP assays, antibodies were classified based on their enrichment profiles: (1) ON-TARGET, only the target protein was enriched showing a z-score  $\times 3$ ; (2) CO-TARGET, the target protein was enriched together with other proteins also associated to a z-score  $\times 3$ ; (3) OFF-TARGET, only proteins other than the expected target were enriched; as well as (4) NO-TARGET, in case no protein was enriched (z-scores  $< 3$ ).

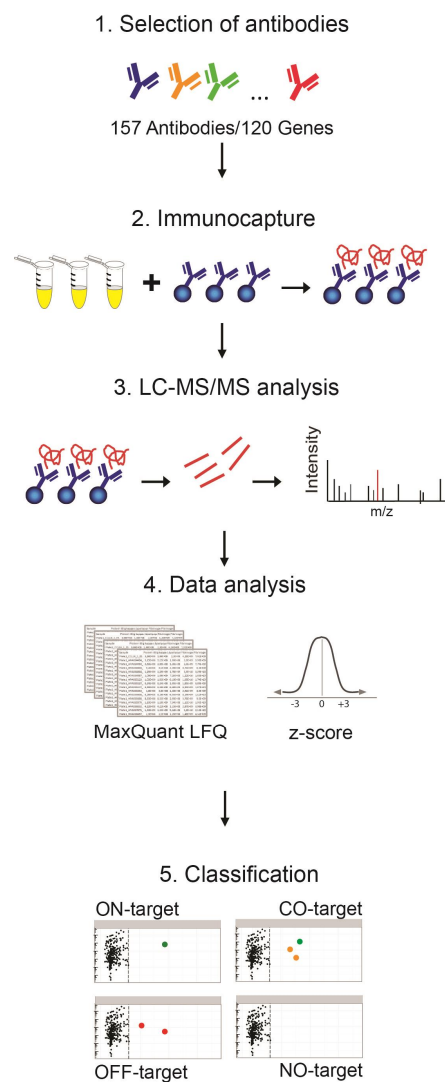

**Figure 1B: Distribution of antigen annotation.** The target proteins of the 157 antibodies were grouped as: Plasma by MS, were identified in plasma previously by mass spectrometry as reported by Peptide Atlas. Cellular and Extracellular were assigned according to Gene Ontology classification (see Materials and Methods). Numbers stated inside the pie chart refer to the number of antibodies (Abs) in the category and corresponding number of target proteins..

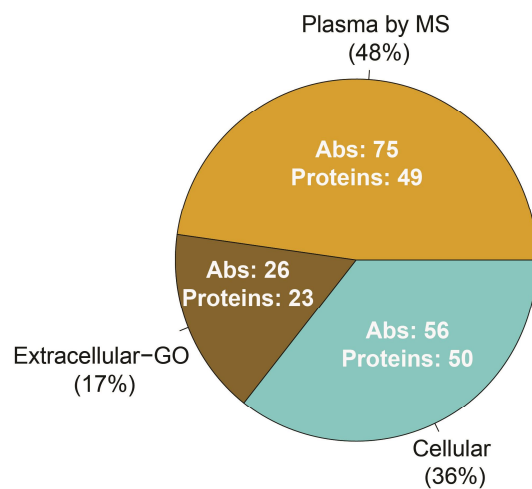

**Figure 1C: Distribution of frequencies of identification.** The proteins obtained from assays conducted in heat-treated (red) vs untreated plasma (black) were collected in terms of the number of times they were observed in the IP-MS data. For both sample types, the majority of the 1313 proteins were found in less than 20% of the IPs.

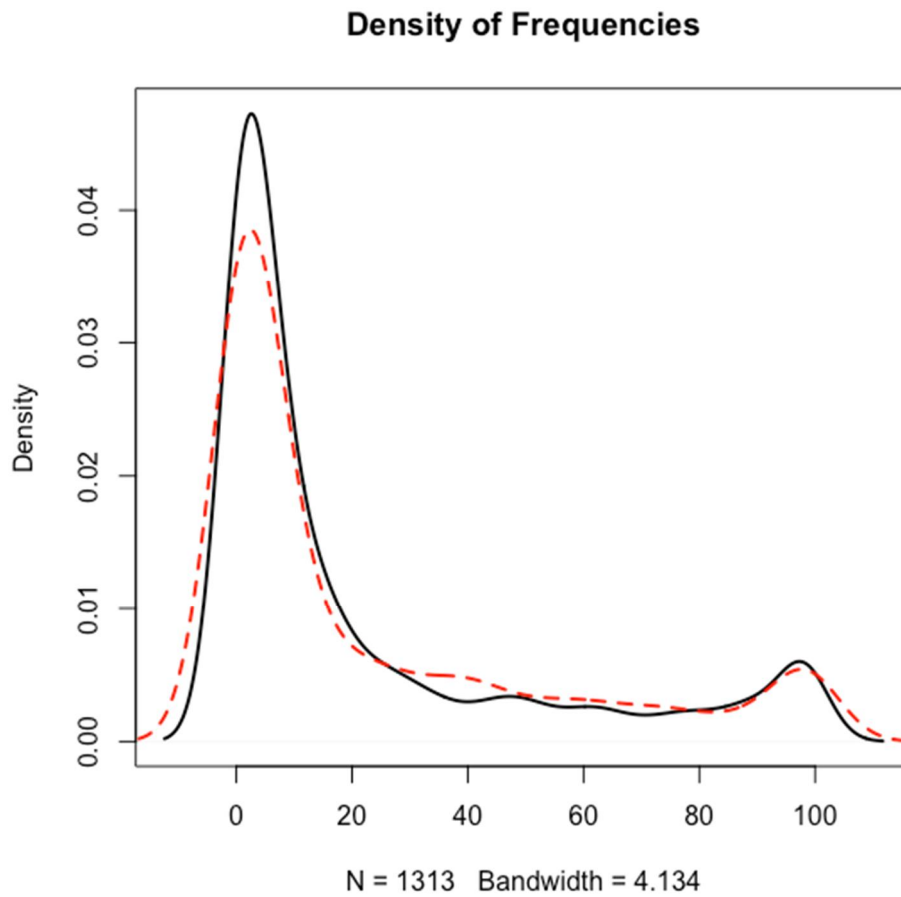



**Figure 1D: Frequency vs Concentration.** Estimated concentrations in PeptideAtlas were compared between frequent (>20%) and less frequent (<20) protein identifications.

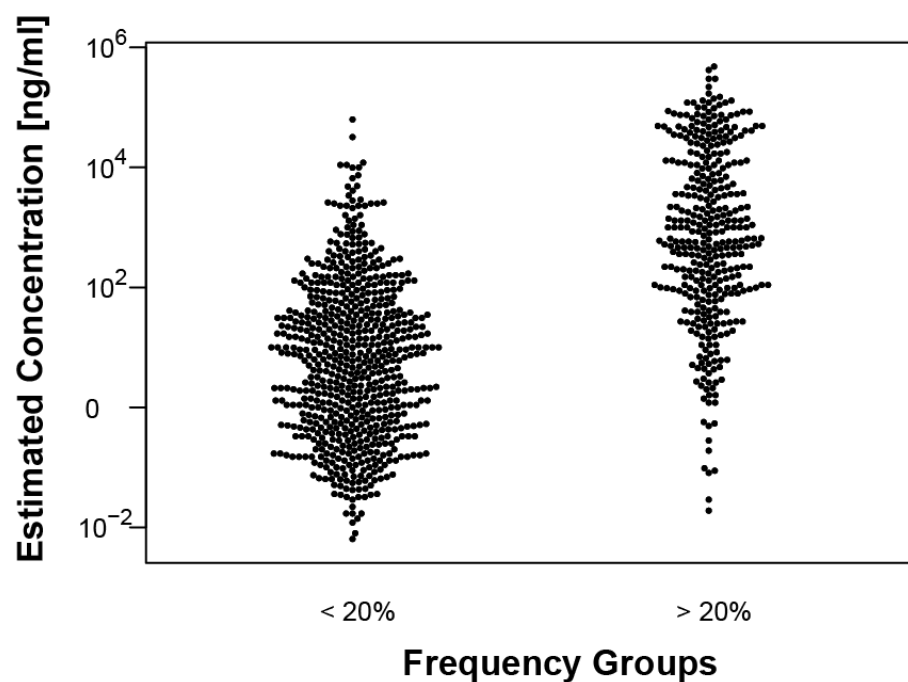

**Figure 2: Frequency correlation.** The relation between the frequency percentages of protein occurrence in IPs performed with heat-treated and untreated plasma is shown. The red line represents the line of identity.

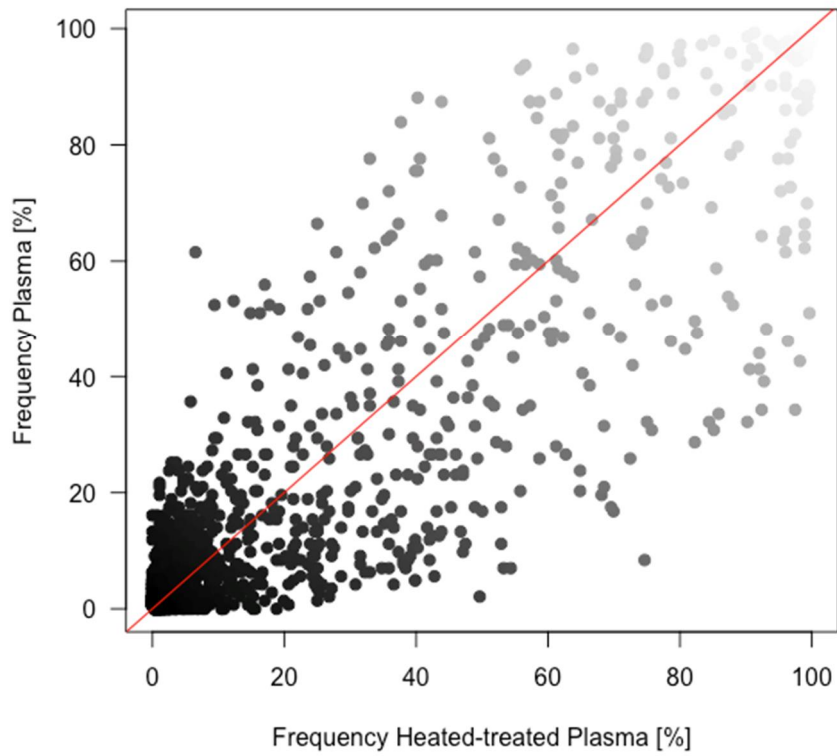



**Figure 3 B: Paired antibodies and co-enrichment profiles.** The z-score/LFQ intensity plots of paired antibodies raised against IGFBP2 are shown for HPA004754, HPA045140, HPA077723. (H+) refers to heat treated plasma and (H-) to untreated plasma. IGF2 was identified as P01344, and P01344-2 (\*).

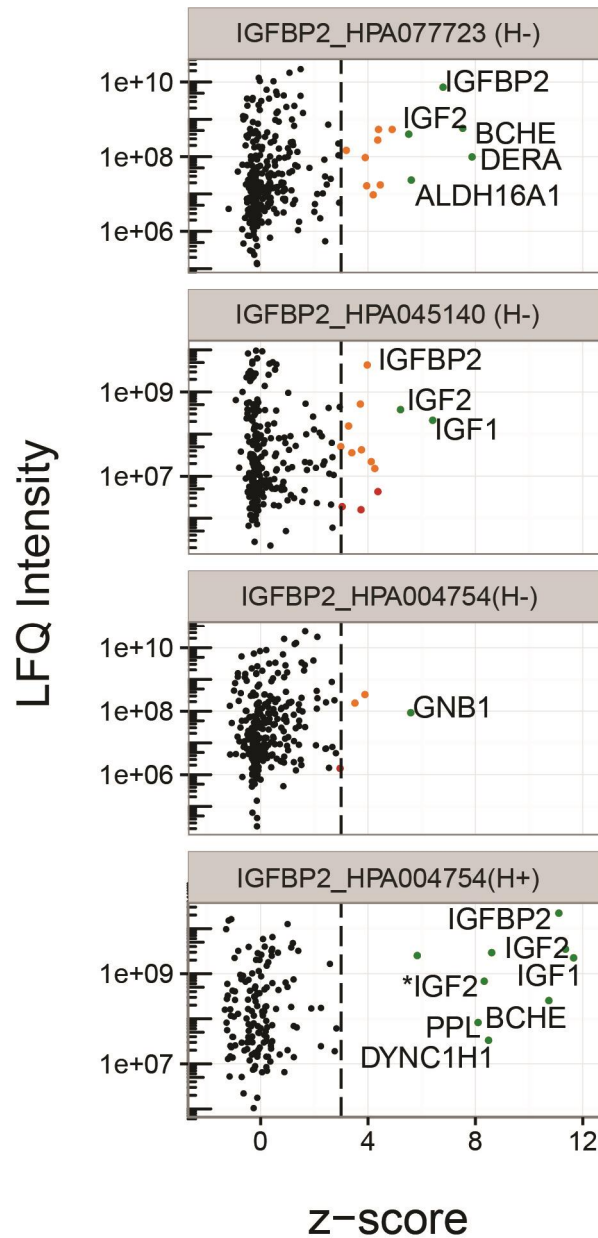

**Figure 4:IGFBP2 protein interaction analysis by sandwich immunoassay.** Dilution curves of plasma analyzed by sandwich assays using different combination of capture and detection antibodies. Dots represents mean value with standard error (SD) bars. In black, heated plasma (H+); in gray,non-heated plasma (H-).

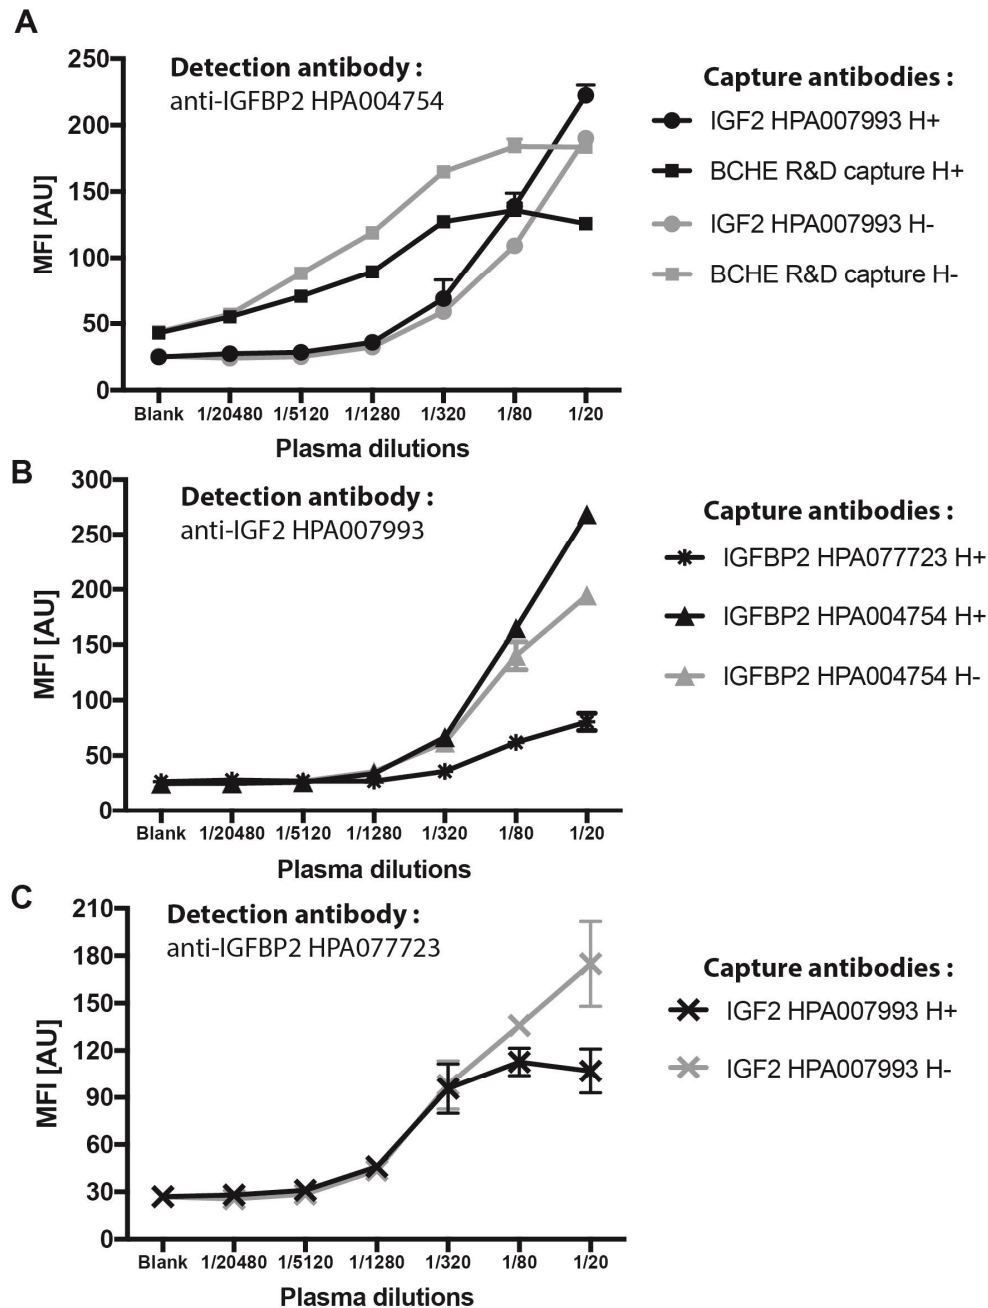

**Table 1: Annotation and categorization and of antibodies.**

| Annotated target location | On/Co-Target |    | Off/No-Target |    | Sum |     |
|---------------------------|--------------|----|---------------|----|-----|-----|
|                           | N            | %  | N             | %  | N   | %   |
| <b>Cellular</b>           | 15           | 27 | 41            | 73 | 56  | 36  |
| <b>Extracellular</b>      | 9            | 34 | 17            | 65 | 26  | 16  |
| <b>Plasma (MS)</b>        | 46           | 61 | 29            | 39 | 75  | 48  |
| <b>Total</b>              | 70           | 45 | 87            | 55 | 157 | 100 |

**Table 2: Antibody pairs tested in plasma and with recombinant proteins.** Annotation (✓): Trends from sample dilution assays were obtained with at least one combination of antibodies for the same protein either in heated or untreated samples. Annotation (-): No sample concentration dependent data was obtained. (Details regarding each single pair in Supplementary Excel Sheet  $\delta$ Reagents\_Lot\_Numbers $\delta$ , catalog numbers of the functional pairs are indicated in **Figure 4** and **Supplementary Figure 10**.)

| SAMPLE     | DETECTION ANTIBODY | CAPTURE ANTIBODIES |           |           |           |            |
|------------|--------------------|--------------------|-----------|-----------|-----------|------------|
|            |                    | anti-IGFBP2        | anti-IGF2 | anti-BCHE | anti-IGF1 | anti-DEIRA |
| Plasma     | anti-IGFBP2        | ✓                  | ✓         | ✓         | -         | -          |
|            | anti-IGF2          | ✓                  | ✓         | -         | -         | -          |
|            | anti-BCHE          | -                  | -         | ✓         | -         | -          |
|            | anti-IGF1          | -                  | -         | -         | ✓         | -          |
|            | anti-DEIRA         | -                  | -         | -         | -         | -          |
| Rec-IGFBP2 | anti-IGFBP2        | ✓                  | -         | -         | -         | -          |
| Rec-IGF2   | anti-IGF2          | -                  | -         | -         | -         | -          |
| Rec-BCHE   | anti-BCHE          | -                  | -         | ✓         | -         | -          |
| Rec-IGF1   | anti-IGF1          | -                  | -         | -         | -         | -          |



## SUPPLEMENTARY FIGURES & TABLES

### Supplementary Figure 1A: Distribution of number of antibodies targeting each protein.

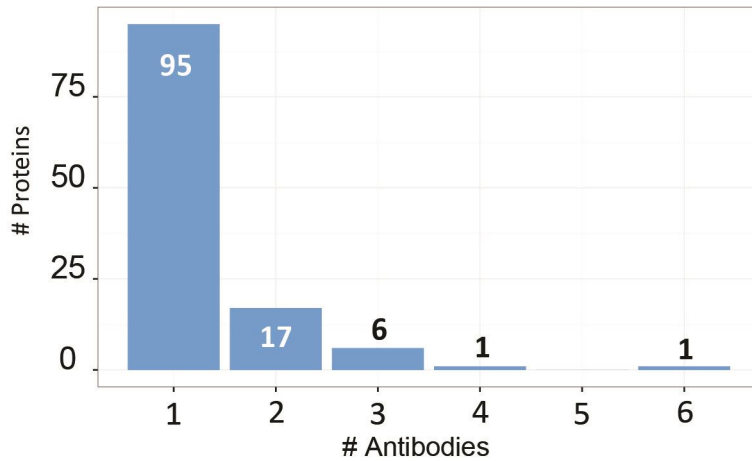

**Supplementary Figure 1B: Coverage of proteins identified.** Distribution of ON-target and CO-target antibodies based on the peptides identified for the intended target: peptides only covering the PrEST sequence (in PrEST), peptides not covering the PrEST (outside PrEST) or peptides identified inside and outside PrEST sequence (both).

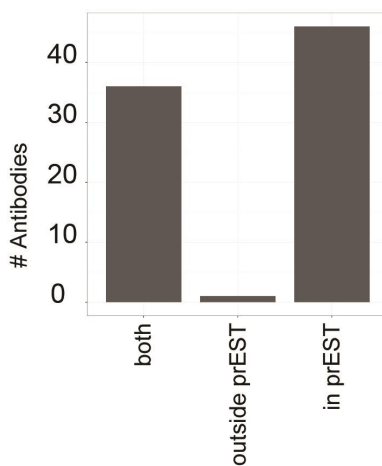

**Supplementary Figure 2A:** Optimization of experimental and technical conditions. Commercial antibodies targeting known plasma proteins of different abundance (C2, CCL16, CST3, IL1A, KLK3, LCN2) were used to establish optimal experimental conditions for volume of plasma and number of beads coupled to antibody.  $\phi$ =volume of plasma in  $\mu$ L;  $\beta$ = number of coupled beads (500000b = 1.6  $\mu$ g of antibody).

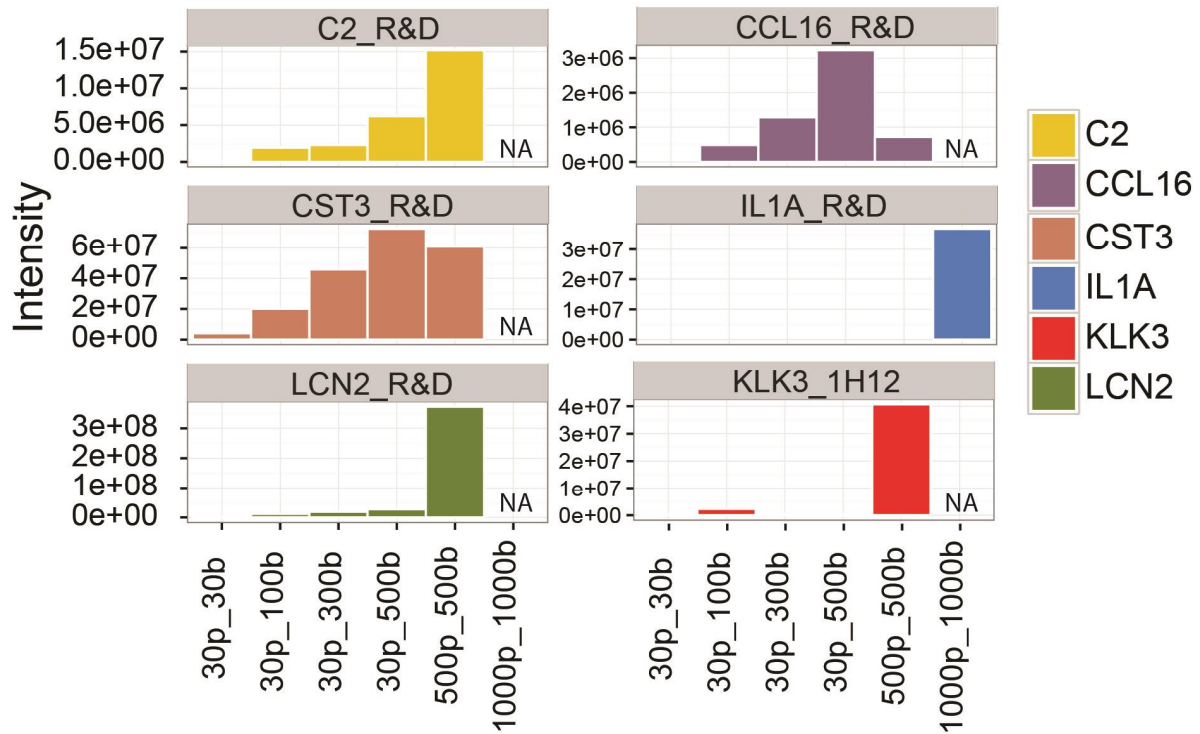

**Supplementary Figure 2B: Effect of library size.** Data derived from IP assays with antibodies targeting the plasma proteins of C2, CCL16, CRP, CST3, NGAL and KLK3 (PSA) was analyzed using the pilot library limited to only these 21 IPs (left column, pilot) as well as the library of more than 400 IP (right). In this experiment, 100  $\mu$ l of plasma and 500,000 beads were applied.

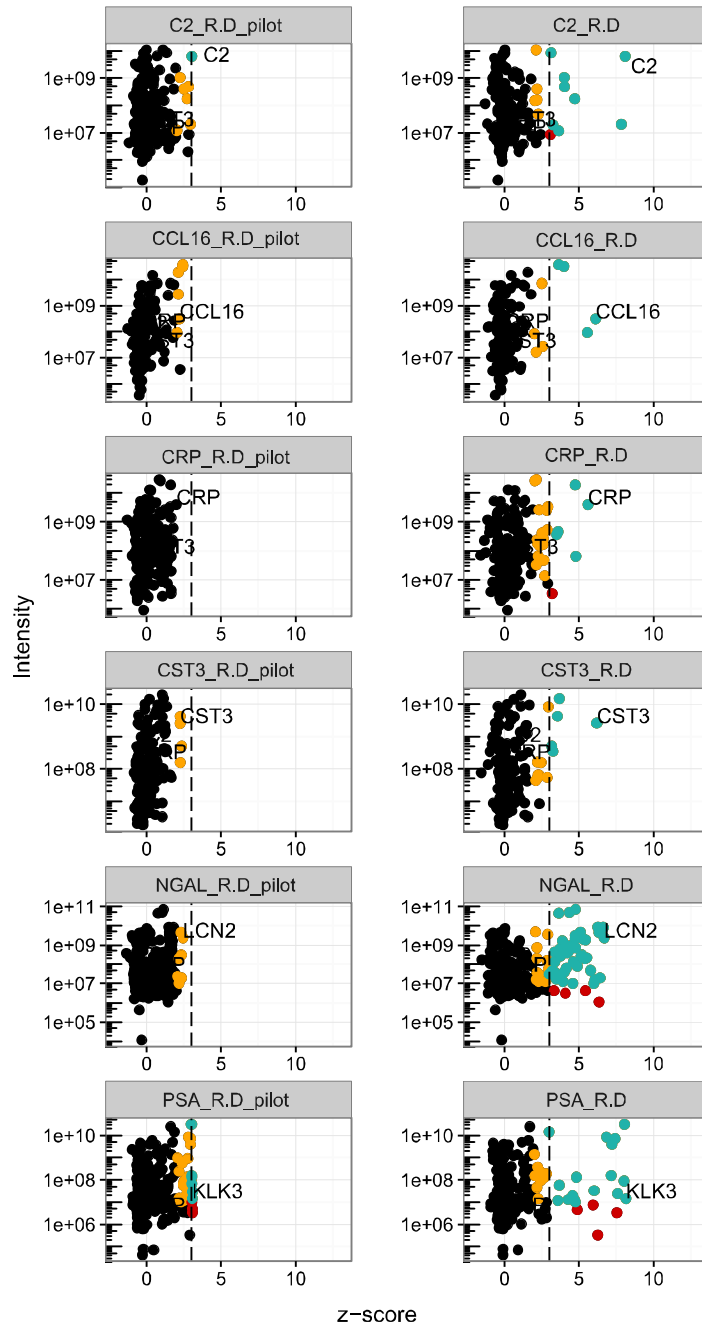

**Supplementary Figure 3 A:** Relation between estimated plasma concentration [ng/ml] and frequency [%] for untreated plasma. Blue dots represent proteins for which estimated values of concentration were not present in PeptideAtlas.

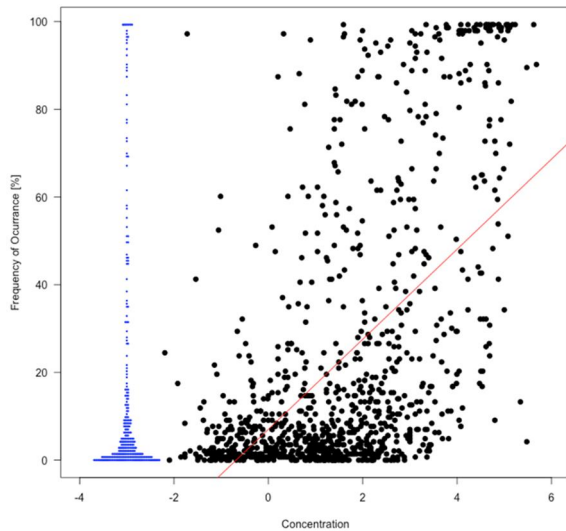

**Supplementary Figure 3 B:** Relation between estimated plasma concentration [ng/ml] and frequency [%] for heat-treated plasma. Blue dots represent proteins for which estimated values of concentration were not present in PeptideAtlas.

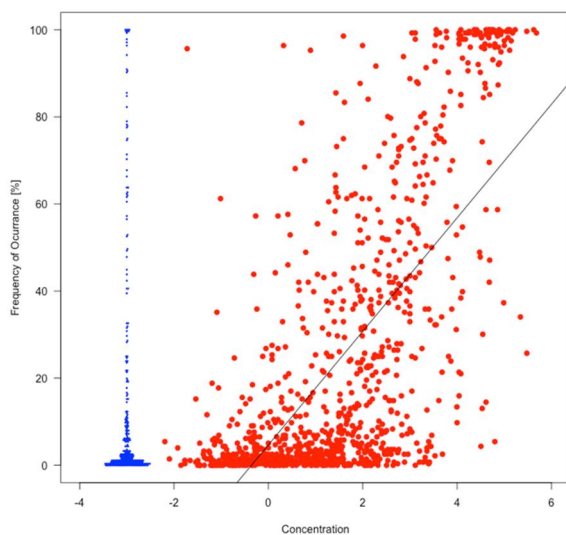

## Supplementary Figure 4 Evaluation of contaminant proteins identified by pIPs and comparison of experimental batches.

**Supplementary Figure 4 A: Two ways hierarchical clustering analysis of the proteins identified in 414 immunoprecipitations.** Clustering distance: "euclidean"; Clustering method: Ward. Cluster bars represent (1) different experimental batches and (2) sample heat treatment.

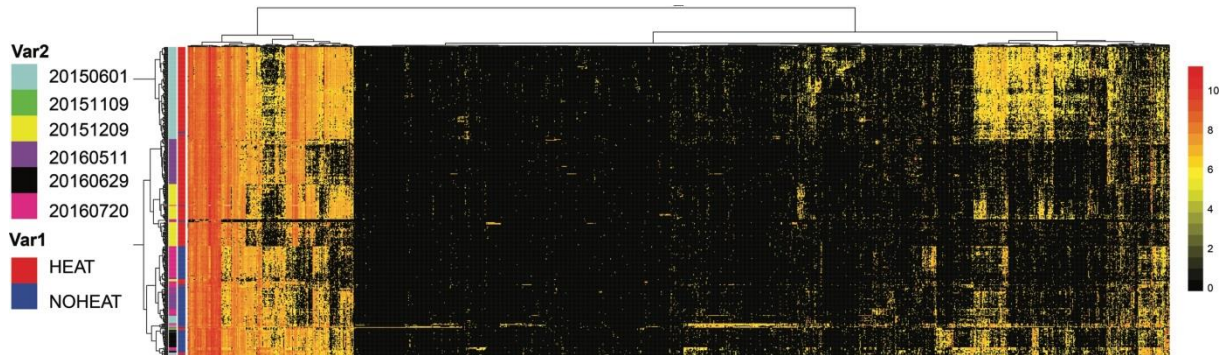

**Supplementary Figure 4 B: Representation of principal component analysis (PCA) with dots colors indicating the experimental batches.**

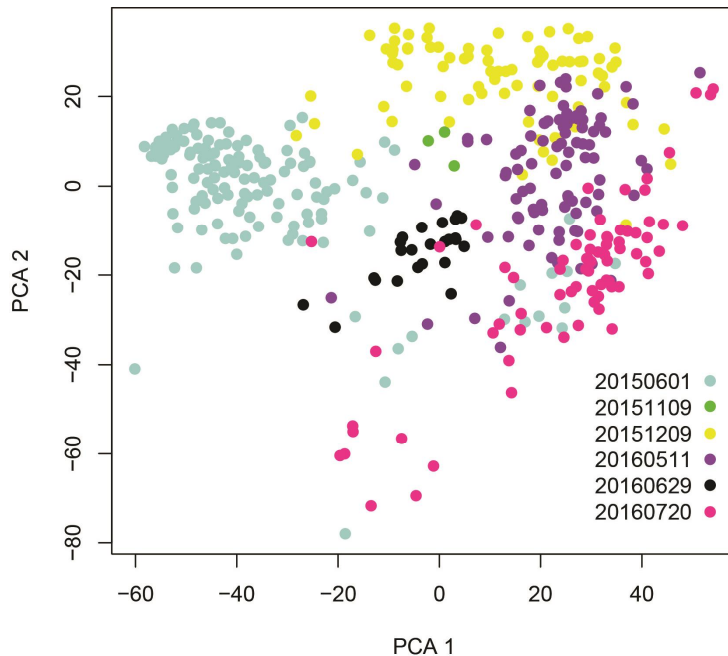

**Supplementary Figure 5. Comparison of LFQ protein intensities for IMS performed in heat treated versus in not heat treated plasma.** Circled in red high abundant plasma proteins which abundance in the background increases when plasma is heat treated.

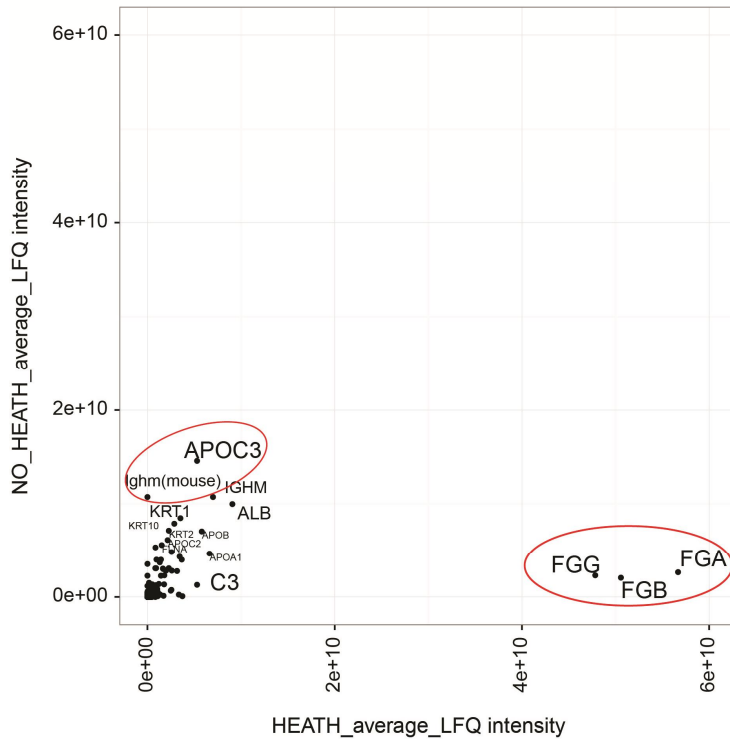

**Supplementary Figure 6: Ranked distribution of the detection of passenger antigens on antibody coupled beads.**

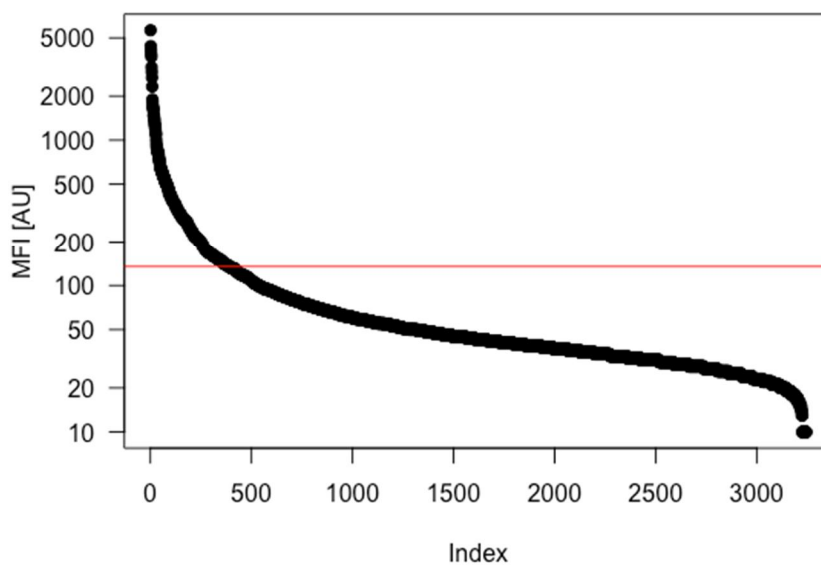

**Supplementary Figure 7A:** Interaction networks of CCL16 and CCL18 taken from String database V10.5 (20 interactors, 1<sup>st</sup> shell only).

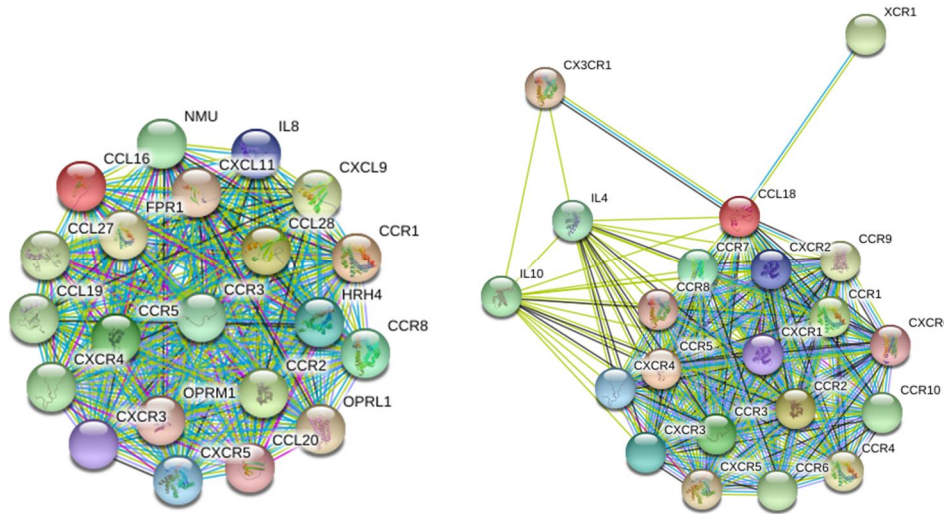

**Supplementary Figure 7B:** Sequence homology search of CCL16-CCL18 using CLUSTALO alignment revealed a 26.6% homology. In Yellow: Amino acidic sequence used as antigen in the generation of the antibody (PrEST).

CLUSTAL O(1.2.3) multiple sequence alignment

```

SP|O15467|CCL16_HUMAN MKVSEAAALSLVLVLIITSASRSQPKVPEWVNTPSTCCLKYYEKVLPRLVVGYRK-ALN 59
SP|P55774|CCL18_HUMAN MKGLAAA--LLVLVCTMALC-----SCAQVGTNKELCCLVYTSWQIPQKFIVDYSETSPQ 53
** ** *****: :: . . . . . *** * . :*:::*.* : : :

SP|O15467|CCL16_HUMAN CHLPAIIFVTKRNREVCTNPNDWVQEYIKDPNLPPLPTRLNLSTVKIITAKNGQPQLNS 119
SP|P55774|CCL18_HUMAN CPKPGVILLTKRGRQICADPNKKWVQKYISDLKLN----- 89
* * .:.*:***.*:.*:.*:***.*:.*:.*:
    
```

SP|O15467|CCL16\_HUMAN Q 120  
 SP|P55774|CCL18\_HUMAN -









**Supplementary Figure 7G:** Sequence homology search of MMP1-MBL2 using CLUSTALO alignment revealed a 10.33 % homology. CLUSTAL. In Yellow: Amino acidic sequence used as antigen in the generation of the antibody(PrEST).

CLUSTAL O(1.2.4) multiple sequence alignment

```
SP|P03956|MMP1_HUMAN MHSFPPLLLLLFWGVVSHSF PATLETQEQDVDLVQKYLEKYYNLKNDRQVEKRRNSGPV 60
SP|P11226|MBL2_HUMAN MSLFPSLPLLL-LSMVAASYSETVTCEDAQKTCPA----- 34
* ** * *** .:* : * : : :

SP|P03956|MMP1_HUMAN VEKLEKQMQEFFFGLKVTGKPDAAETLKVVMKQPRCGVPDVAQFVLTEGNPRWEQTHLTYRIEN 120
SP|P11226|MBL2_HUMAN -----VIACSSPFGINGFPGKDGRD----- 53
* . * : * . : * .

SP|P03956|MMP1_HUMAN YTPDLPRADV DHAIEKAFQLWSNVTPLETF TKVSEGGADIMISFVRGDHRDNSPF DGP GGN 180
SP|P11226|MBL2_HUMAN -----G TKG EKGE PG-----QGLRGLQGP PGK 75
** . : * : . : . : : * * *

SP|P03956|MMP1_HUMAN LAHAFQPGP-----GIGGDAHFD EDERW TNNFREYNLHRVAAHELGHSLG 225
SP|P11226|MBL2_HUMAN LGPPGNPGPSGSPGPKGQKGDGPKSPDGDSSLAASERKALQTEMARIKKWLT FSLGKQVG 135
* . : *** . . * : : . * * : : . : : : : * * * : : *

SP|P03956|MMP1_HUMAN LSHSTDIGALMYP SYTFSGDVQLAQDDIDG IQAIYGRSQNPVQPIGPQTPKACDSKLTFD 285
SP|P11226|MBL2_HUMAN NKFFLTNGEIMT-----FEKV KALCVKF---QASV-----ATPRNA AEN---G 172
.. * : * : : : : : : * * ** : . : .

SP|P03956|MMP1_HUMAN AIT TIRGEVMFFKDRFYMRTNPFYFEVELNFISVFWPQLPNGLEAAYEFADRDEVRFFKG 345
SP|P11226|MBL2_HUMAN AIQNLIKEEAFLGITDEKTEGQFVDLTGNRLTYTNWNEGEP---NNAGSDEDCVLLL-K 227
** . : * * : . * . . : . * : : * . * * : :

SP|P03956|MMP1_HUMAN NKYWAVQGNV LHGYPKDIYSSFGFPRTVKHIDAALSEENTGKTYFFVANKYWR YDEYKR 405
SP|P11226|MBL2_HUMAN NGQWNDVPCSTS-----HLAVCEFP I----- 248
* * . : * *

SP|P03956|MMP1_HUMAN SMDPGYPKMI AHDFPGIGHKVD AVFMKDGFFYFFHGT RQYKFDPKTKRIL TLQKANSWFN 465
SP|P11226|MBL2_HUMAN -----

SP|P03956|MMP1_HUMAN CRKN 469
SP|P11226|MBL2_HUMAN -----
```

**Supplementary Figure 8.** Bar plot representation of the number of proteins to which a z-score  $\times 3$  was assigned. Values of z-scores were rounded.

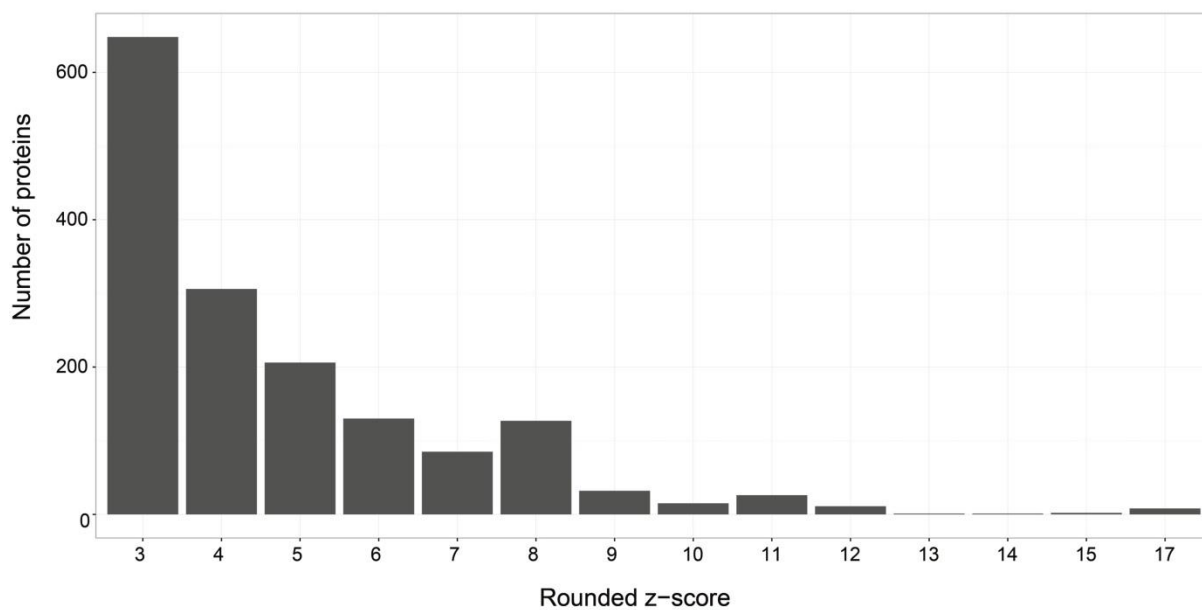

**Supplementary Figure 9:** Bar plot representation of proteins identified as co-targets for more than 3 antibodies.

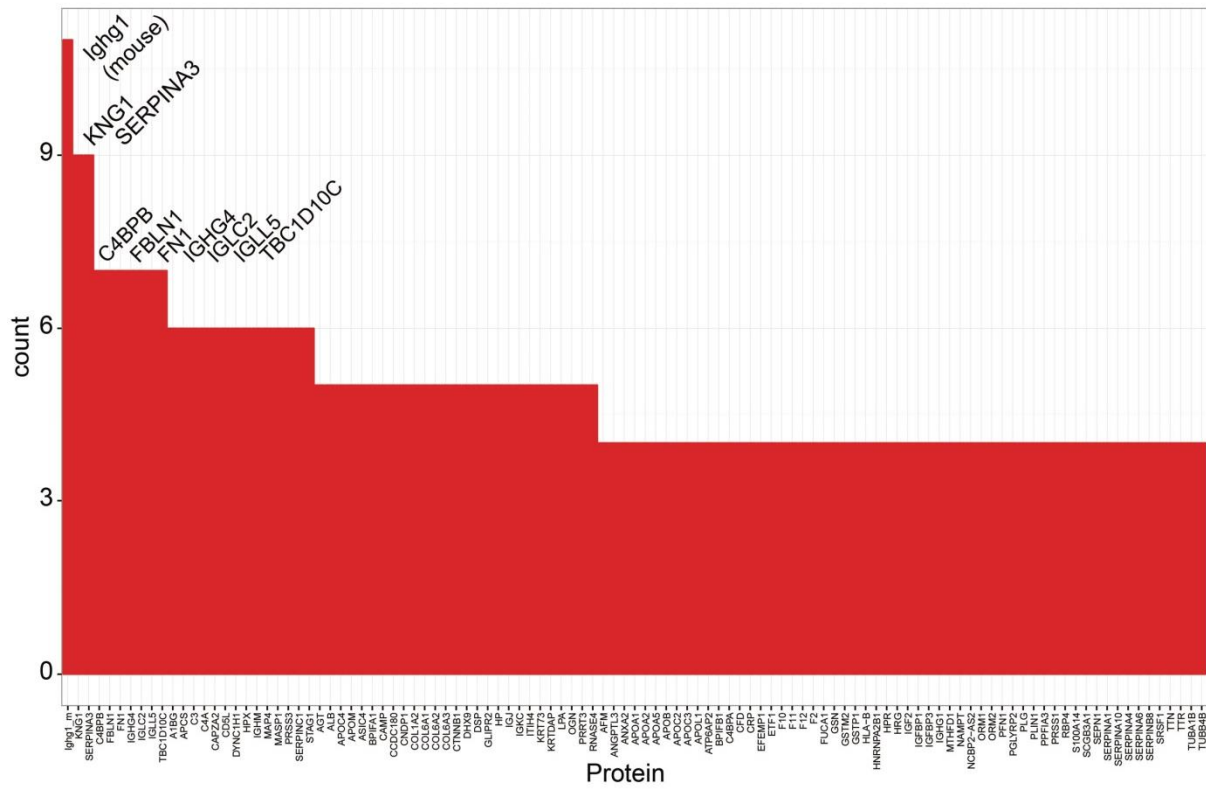

**Supplementary Figure 10.** Defining a LFQ cut-off base on the Distribution of LFQ intensities associated to proteins identified (A) in a single; (B) duplicate and (C) in triplicate experiments.

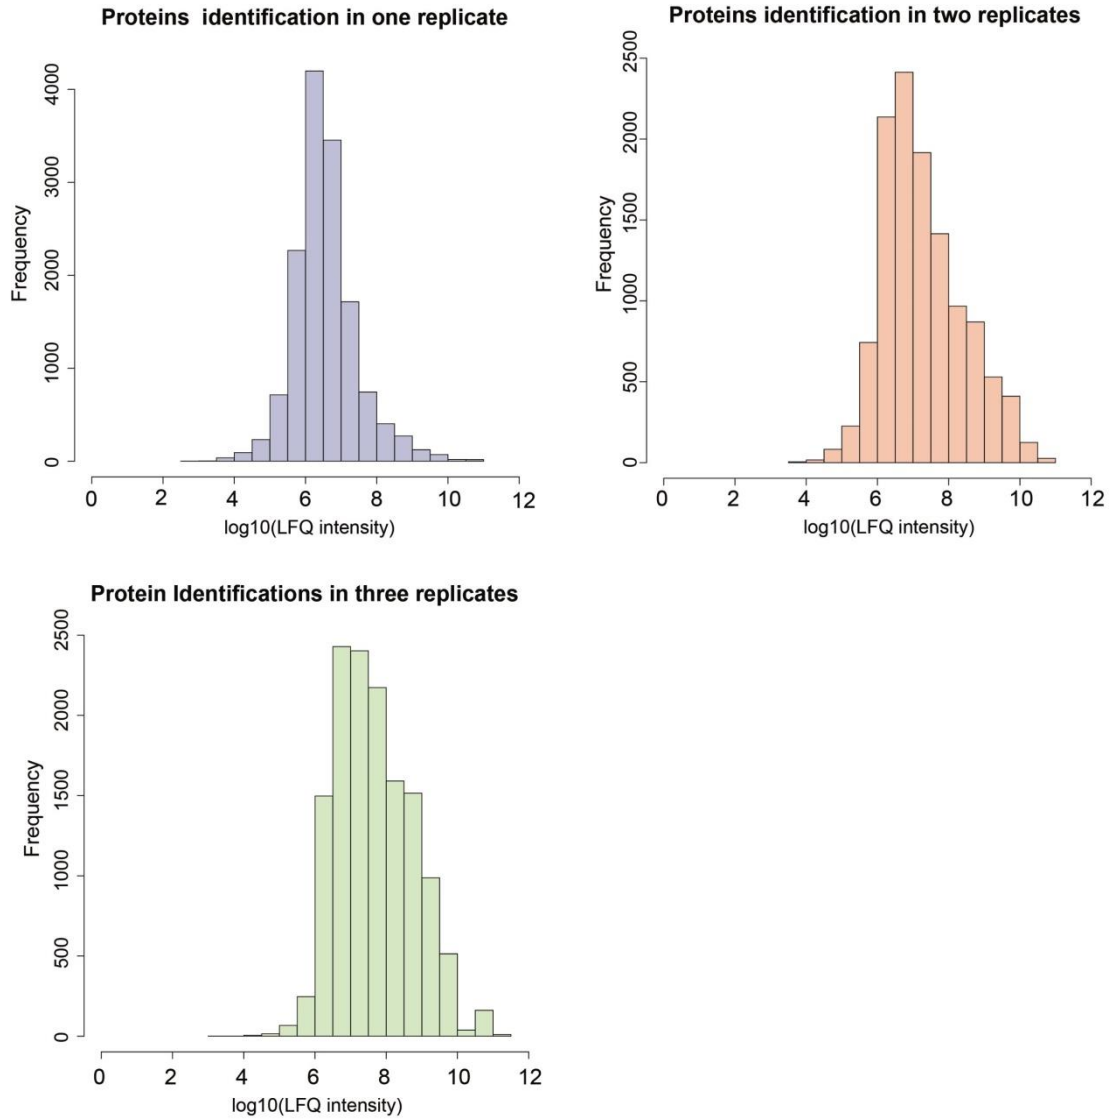

**Supplementary Figure 11 Combinations of antibodies were tested in plasma.** The MFI values of the corresponding pair of antibodies indicated for the EC50 plasma concentration. Headers of the plots indicate the detection antibody and on the x axis is the capture antibody. The data calculated is based on the mean values ( $\pm$ SD) of duplicate dilution curves. Dark grey (H+, heated plasma), Light grey (H-, untreated plasma).

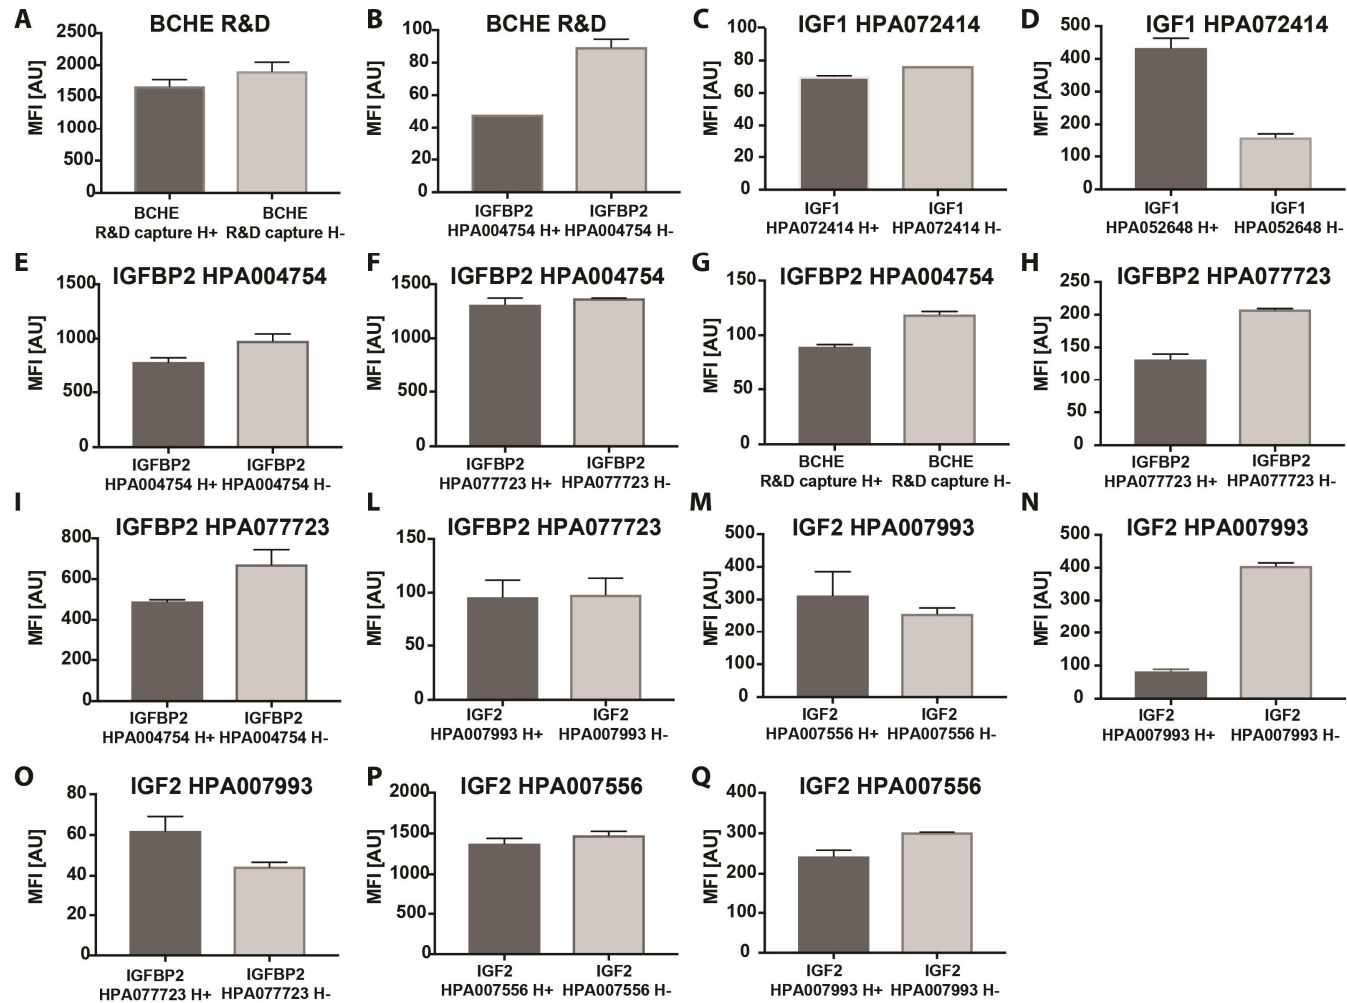

**Supplementary Table 1. Comparison of validation rate by pIPs and WB for 104 antibodies assessed previously in plasma by WB.** An antibody was considered passed by WB if scored 1,2 or 3, according to the Human Protein Atlas project.

| <b>Method</b>               | <b>Plasma (MS)/Extracellular</b> | <b>Cellular</b> | <b>Sum</b> |
|-----------------------------|----------------------------------|-----------------|------------|
|                             | N (%)                            | N (%)           | N (%)      |
| <b>Pass by pIPs + WB*</b>   | 11 (19)                          | 2 (4)           | 13 (13)    |
| <b>Pass only by WB</b>      | 8 (13)                           | 13 (29)         | 21(20)     |
| <b>Pass only by pIPs</b>    | 20(34)                           | 12 (29)         | 32 (31)    |
| <b>WB (Total)</b>           | 19 (32)                          | 15 (33)         |            |
| <b>pIPs (Total)</b>         | 32 (54)                          | 15 (33)         |            |
| <b>Failed by pIPs + WB*</b> | 20 (34)                          | 18 (40)         | 38 (36)    |
| <b>Total*</b>               | 59 (100)                         | 45 (100)        | 104 (100)  |

## SUPPLEMENTARY EXCEL TABLE

### Description of content of each Sheet.

- Selected targets: Description of proteins for which antibodies were selected. (See Supplementary References 23-108)
- Protein Annotation (GO): Protein annotation using GO terms.
- Antibodies experim. annotations: Antibodies used in the study, annotations about experimental conditions and data of validation by pIP and WB
- Frequencies of identification: List of proteins identified in pIP experiments and their frequencies of identification in heat treated or not heat treated plasma.
- Batches Kruskal Wallis Test: p-values for differences in intensity levels detected the between batches
- Go enrichment analysis: Differential GO analysis using TOPP cluster between frequent (> 20%) and less frequently occurring proteins (< 20%).
- z-score >2.5: List proteins for which a z-score > 2.5 was calculated containing targets, off-targets and potential interactors.
- List of Peptides: Peptides identified in pIP assays for the expected target proteins and overlapping with the antigen used to generate the antibodies.
- Experimental Batches: description of major differences in the experimental conditions for the 6 experimental batches analyzed.
- Reagents Catalogs\_Lot\_numbers: List of catalog and lot numbers for affinity reagents.
- Antibodies against same protein: proteins enriched by antibodies raised against the same target protein, using same or different protein fragments.



## 1 MATERIAL AND METHODS

### 2 2.1 Sample collection.

3 Human EDTA plasma from a pool of individuals (50% females) was obtained from Seralab (Sera  
4 Laboratories International Ltd). Aliquots of plasma (0.5 mL) were stored in cryogenic vials at -80°C  
5 and thawed at 4°C before use.

### 6 2.2 Target selection

7 Information about target proteins their functions and involvement in diseases were collected through  
8 literature searches, Gene Ontology (GO, <http://www.geneontology.org/>), Human Protein Atlas (HPA,  
9 <http://www.proteinatlas.org/>), and Early Detection Research Network (EDRN,  
10 <https://edrn.nci.nih.gov/>). Plasma protein abundances were obtained from the 2017 built of the Plasma  
11 PeptideAtlas ([1], [www.peptideatlas.org](http://www.peptideatlas.org/)). Proteins were classified using the following terms: (i)  
12 Cellular or Extracellular, when the proteins appeared in one or more of the terms extracellular region  
13 (GO:0005576); extracellular space (GO:0005615); extracellular exosome (GO:0070062);  
14 proteinaceous extracellular matrix (GO:0005578); (see columns “GO CC Complete” and “Summary  
15 of GO CC” in the Excel sheet “Protein Annotation GO”). The list of antibodies and information was  
16 reported in Supplementary Excel Tables. The analysis included 157 antibodies. There were 15  
17 monoclonal antibodies (10 from R&D Systems; 1 from HyTest Ltd.; 3 from Atlas Antibodies and 1  
18 from SigmaAldrich) and 144 polyclonal antibodies from the Human Protein Atlas [2]. In addition,  
19 normal rabbit IgG (Bethyl Laboratories), mouse IgG and rat IgG (both Santa Cruz Biotechnology)  
20 were included as controls. Catalog and lot numbers are listed in Supplementary Excel Tables. For  
21 antibodies obtained by the Human Protein Atlas, antibody IDs and lot numbers are the same.

### 22 2.3 Antibody coupling to magnetic beads.

23 Covalent coupling of antibody to magnetic beads (MagPlex, Luminex Corp.) was performed as  
24 previously described [3]. Briefly beads were activated using sulfo-NHS (Sulfo-N-  
25 hydroxysulfosuccinimide, Thermo) and ethyl-carbodiimide (EDC, both Thermo). Then 1,6 µg  
26 antibodies diluted in MES buffer per 500 000 beads were incubated 2 h at room temperature, beads  
27 were washed and stored in blocking buffer at 4 °C.

### 28 2.4 Immunocapture-mass spectrometry

29 Aliquots of EDTA plasma (Seralab) were diluted 1:10 in assay buffer containing 0.5% w/v PVA  
30 (Sigma-Aldrich), 0.8% w/v PVP (Sigma-Aldrich), 0.1% w/v casein (Sigma-Aldrich) and 10 % of  
31 rabbit IgG (Bethyl Laboratories, Inc.). Samples undergoing heat treatment were incubated for 30 min  
32 at 56 °C in water bath, before being combined with beads and incubated overnight on a rotation shaker  
33 at 23°C. For the final assessment of 153 antibodies 100 µl of crude plasma and 1,6 µg of antibody  
34 couple to beads were applied in each incubation. On the next day, and using a magnetic bead handler  
35 (KingFisher™ Flex Magnetic Particle Processors, Thermo Scientific), beads were separated from the

36 sample, washed with 0.03% Chaps in PBS and re-suspended in digestion buffer containing 50 mM  
37 ammonium bicarbonate (Sigma-Aldrich) and 0.25% sodium deoxycholate (Sigma-Aldrich). Proteins  
38 were reduced with 1 mM DTT (Sigma-Aldrich) at 56 °C for 30 min, and alkylated by iodoacetamide 4  
39 mM (Sigma-Aldrich), at RT in the dark for 30 min. Alkylation was quenched adding 1 mM DTT.  
40 Proteins were digested using a mixture of Trypsin and LysC at 1:25 trypsin-to-protein ratio (Promega,  
41 USA) overnight at 37 °C. Enzyme inactivation and sodium deoxycholate precipitation was obtained  
42 adding 0.005% TFA. Peptides in the supernatant were then separated from beads, dried and re-  
43 suspended in solvent A containing 3% acetonitrile (ACN) and 0.1% formic acid (FA).

#### 44 **LC-MS/MS.**

45 MS analysis was performed using a Q-Exactive HF (Thermo) operated in a data dependent mode,  
46 equipped with an Ultimate 3000 RSLC nanosystem, Dionex). Samples were injected into a C18 guard  
47 desalting column (Acclaim pepmap 100, 75  $\mu\text{m} \times 2$  cm, nanoViper, P/N 164535, Thermo) and then  
48 into a 50 cm x 75 $\mu\text{m}$  ID Easy spray analytical column packed with 2 $\mu\text{m}$  C18 (EASY-Spray C18 P/N  
49 ES803, Thermo) for RPLC. Elution was performed in a linear gradient of Buffer B (90% ACN, 5%  
50 DMSO, 0.1% FA) from 3 % to 43% in 50 min at 250 nL/min. The proportion of Buffer B was  
51 increased stepwise to 45% in 5 min, then to 99% in 2 min, and then held for 10 minutes. DMSO was  
52 added Buffer A for the chromatography (90% water, 5% ACN, 5% DMSO, 0.1% FA). Full MS scan  
53 (300-1600 m/z) proceeded at resolution of 60,000. Precursors were isolated with a width of 2 m/z and  
54 listed for exclusion for 60 s. The top five most abundant ions were selected for higher energy collision  
55 dissociation (HCD). Single and unassigned charge states were rejected from precursor selection. In  
56 MS/MS, a max ion injection time of 250 ms and AGC target of 1E5 were applied.

#### 57 **2.7 Data analysis**

58 Shotgun MS data search was performed on MaxQuant (v1.5.3.30) [4] using the integrated algorithm  
59 MaxLFQ. Spectra were search against a human protein database from Uniprot (accessed on  
60 03/17/2016, Canonical and Isoforms, 20,198 hits customized adding sequences of immunoglobulins  
61 chain C from rabbit, rat and mouse, LysC (PSEAE) and Trypsin (PIG). Settings allowed for two  
62 missing cleavages, methionine oxidation and N-term acetylation as variable modification and cysteine  
63 carbamidomethylation as fixed modification. Fast LFQ and match between runs were applied, three  
64 minimum number of neighbors, and six average number of neighbors. All the 414 raw data files  
65 included in the analysis of 153 antibodies plus controls were analyzed in a single session, LFQ  
66 intensity values obtained were used for the following analysis. We considered as contaminants:  
67 proteins belonging to the list of contaminants in MaxQuant not belonging to Homo sapiens (Human),  
68 Ig gamma chain C region from *Oryctolagus cuniculus* (Rabbit) because known to be in the dilution  
69 buffer and Immunoglobulin variable chains belonging to Homo sapiens (Human), and excluded from  
70 the z-score calculations. We considered missing values as missing not at random (MNAR) [5], but  
71 missing because of concentrations below the limit of detection (LOD). We therefore used  $\text{min} = 0$  as

72 minimum value detected of intensity (Single-value imputation approach). When calculating average  
73 and standard deviation for each protein identified over the population of all experiments, missing  
74 values of LFQ intensities were substituted to 1 to allow for log<sub>10</sub>-transformation before two ways  
75 hierarchical clustering and principal component analysis. For z-scores calculation, when duplicate and  
76 triplicate experiments were available, we considered only proteins identified in all replicates for  
77 further analyses, and calculated average of LFQ intensities. Proteins were considered enriched when  
78 associated to a z-score  $\geq 3$ . To visualize the enriched proteins for each antibody, z-scores and LFQ  
79 intensity values were used and proteins found above the set threshold were annotated accordingly.  
80 Raw data produced to assess experimental conditions were analyzed using MaxQuant but excluding  
81 the function for LFQ..

82 Data analysis and representation was performed on the environment for statistical computing and  
83 graphics R [6]. Alignments between protein and prEST sequences was performed using the Clustal  
84 Omega program available at EMBL-EBI [7]. GO enrichment system was performed using the  
85 PANTHER Classification System (<http://pantherdb.org/>). Comparison of GO terms was conducted  
86 using ToppCluster ([8]; <https://toppcluster.cchmc.org/>), regarding Bonferroni corrected p-values <  
87 0.01 as significant.

## 88 **2.8 Sandwich Immunoassay**

89 The capture antibodies towards IGFBP2, IGF1, IGF2, DERA, BCHE, and rabbit-Immunoglobulin G  
90 (rIgG) and mouse-IgG, as negative controls (**Supplementary Excel Table**, sheet: “Reagents Lot  
91 numbers”), were covalently coupled to color-coded magnetic beads, A Suspension Bead Array (SBA)  
92 was generated and analyzed in Luminex Platform as previously described [9], using an in house  
93 protocol for labeling detection antibodies with biotin [10]. The antibodies were coupled to beads and  
94 labeled in order to test each different combination of capture and detection antibody pairs listed in the  
95 **Supplementary Excel Table**.

96 Plasma (EDTA Seralab, LOT#BRH1147432) was thawed on ice and centrifuged for 1 min at 2000  
97 rpm, and diluted from 1:20 following 4-fold dilutions in PVX casein (PVXC) buffer 10% rIgG. The  
98 dilution series consisted of 6 points in duplicate and were heated at 56°C for 30 min. Then, the plasma  
99 was incubated with the SBA overnight. The same procedure was carried out with non-heated plasma  
100 dilution series.

101 The recombinant proteins used were IGFBP2 and IGF1 were a kind gift from Hanna Tegel and Johan  
102 Rockberg (AlbaNova University Center, KTH), IGF-II (R&D systems, catalog # 292-G2-050, lot  
103 DS2416011) and BCHE (DuoSet kit R&D systems, Catalog # DY6137-05, lot # 1387842). The  
104 dilution series of the proteins in buffer (PVXC 10% rIgG) consisted of 7 points prepared in duplicate  
105 and heated at 56°C for 30 min before incubation with the SBA overnight. Non-heated protein dilution  
106 series were also tested. The standard curves comprised different concentration ranges depending on

107 the protein of interest. IGFBP2 and IGF2 were diluted in buffer from 500 ng/mL following 3-fold  
108 dilutions, IGF1 from 12000 pg/mL following 3-fold dilutions and BCHE 10000 pg/mL following 2-  
109 fold dilutions.

110 The detection antibodies were applied at 1 $\mu$ g/mL (HPA antibodies) or 25 ng/mL (BCHE R&D  
111 systems) for 90 min, and streptavidin- R-phycoerythrin (R-PE) conjugate (Life Technologies;  
112 SA10044) was used for the fluorescence read out in FlexMap3D (Luminex Corp.).

113

114

115

116

117 **SUPPLEMENTARY NOTES**

118 **Supplementary note 1: Optimization of experimental conditions and quality control**

119 Factors such as target protein concentration and properties of ionization of the peptides of interest  
120 would ideally require optimized analysis for each antibody/target. Nevertheless, we began with  
121 developing a procedure applicable to a broad range of antibodies and target proteins. In order to set up  
122 optimal experimental conditions, we evaluated technical aspects such as volume of neat plasma  
123 and amount of antibody. As expected, increasing the volume of plasma, peptides belonging to less  
124 abundant proteins became detectable. For example interleukin 1 alpha (IL1A), with concentrations ~3  
125 pg/mL in healthy human plasma [11], was detectable when 1 mL of plasma and 3.2  $\mu$ g of antibody  
126 were applied (**Supplementary Figure 2A**). We established our protocol to enable the detection of  
127 proteins in a range of concentrations from  $\mu$ g/mL (C2) [12] to high pg/mL (KLK3) [13] [14-17]  
128 (**Supplementary Figure 2B**).

129 **Supplementary Figure 2A: Optimization of experimental and technical conditions.**

130 Antibodies targeting known plasma proteins of different abundance (C2, CCL16, CST3, IL1A, KLK3,  
131 LCN2) were used to establish optimal experimental conditions for volume of plasma and number of  
132 beads coupled to antibody. In the axis legends, 'p' refers to the volume of plasma in  $\mu$ L; and 'b' to  
133 number of coupled beads (e.g. 500b = 500,000 beads = 1.6  $\mu$ g of antibody).

134

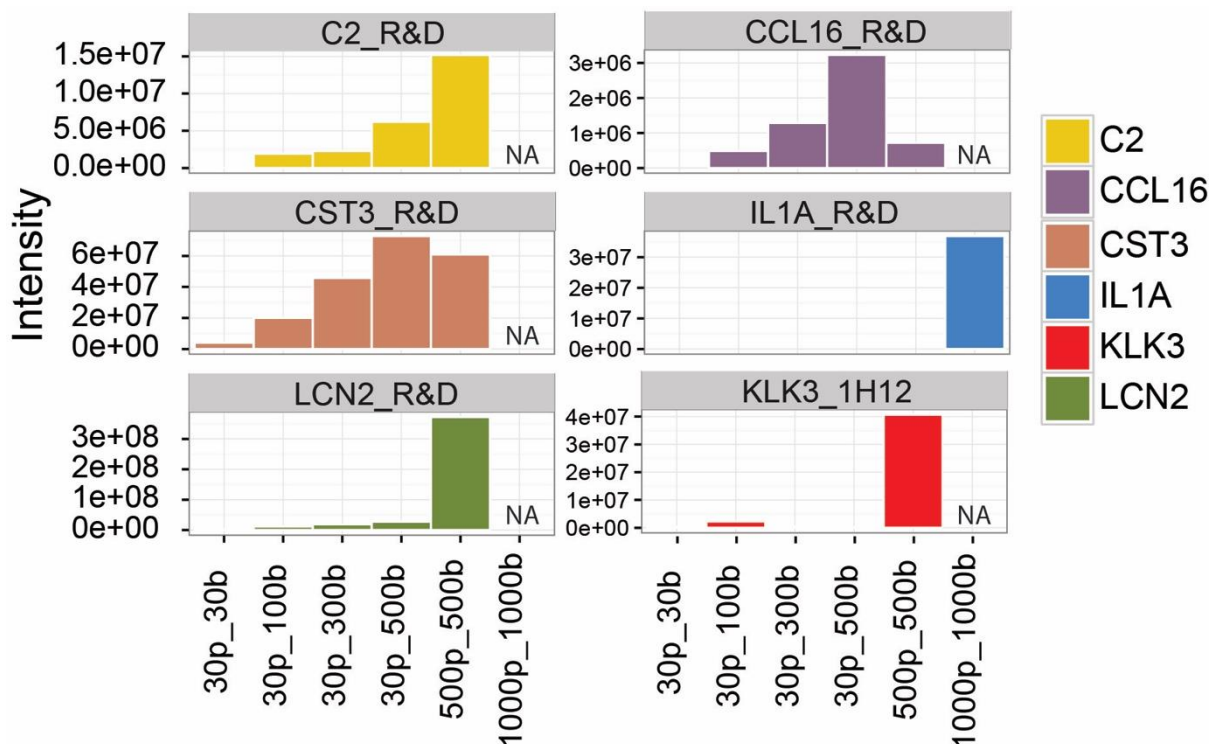

135

136 **Supplementary Figure 2B: Effect of library size.** Data derived from IP assays with antibodies  
137 targeting the plasma proteins of C2, CCL16, CRP, CST3, NGAL and KLK3 (PSA) was analyzed  
138 using the pilot library limited to only these 21 IPs (left) as well as the library of more than 400 IP  
139 (right). In this experiment, 100  $\mu$ l of plasma and 500,000 beads were applied.  
140

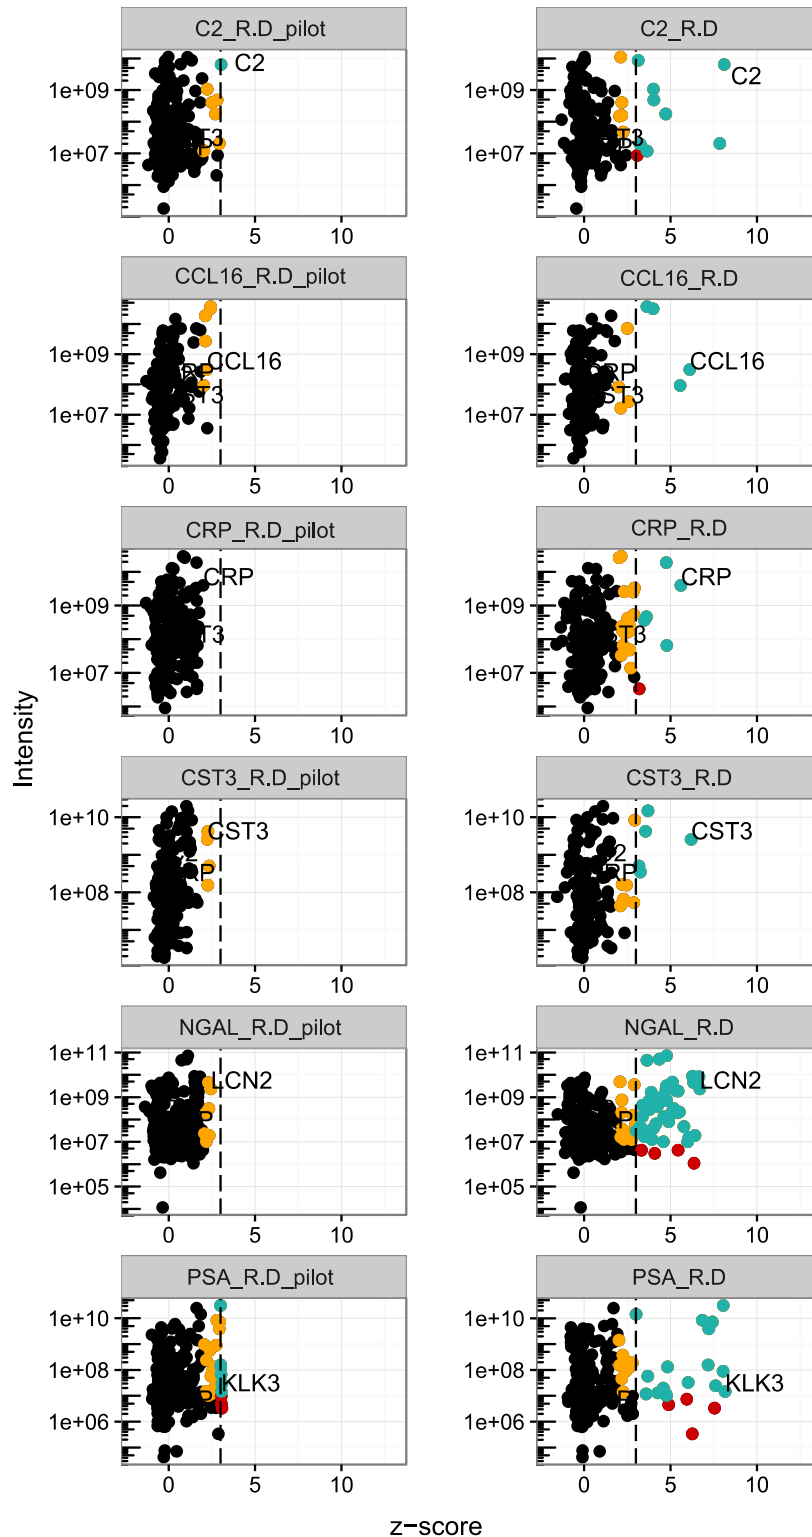

141

142

143 **Supplementary note 2: Batch effects**

144 We observed that independent IPs performed in the same batch clustered together (**Supplementary**  
145 **Figure 3A**). Parameters varying between independent batches IPs include different lots of reference  
146 plasma, trypsin, and analytical columns. Long-term drift in instrumental response, sample handling  
147 and sample heat-treatment may also add additional variability. We found that the main difference  
148 between the different assays was due to heat treatment of the samples. Indeed, despite experimental  
149 batches, assays using either heat treated or untreated plasma clustered together (**Supplementary**  
150 **Figure 4A-B**). For this reason, we decide to analyze IPs with heat treated and not heat-treated plasma  
151 separately, in order to compare the enrichment profiles from the IPs with similar background.

152

153



154 **Supplementary Figure 2A:** Two ways hierarchical clustering analysis of the proteins identified in  
155 414 immunoprecipitations. Clustering distance: "euclidean"; Clustering method: Ward. Cluster lanes  
156 left to the heat map represent (1) different experimental batches and (2) sample heat treatment. **(B)**  
157 Representation of principal component analysis, dots colors highlight separated experimental batches.  
158

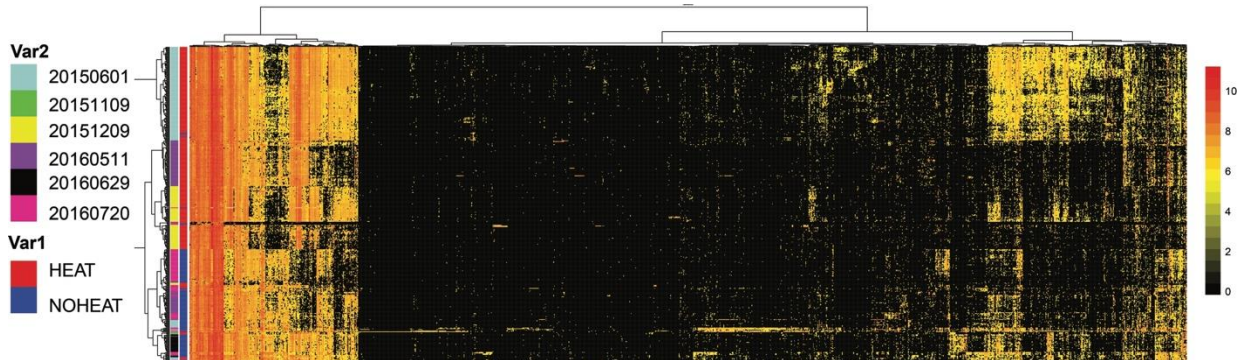

159  
160

161 **Supplementary Figure 2B:** Representation of principal component analysis, dots colors highlight  
162 separated experimental batches.

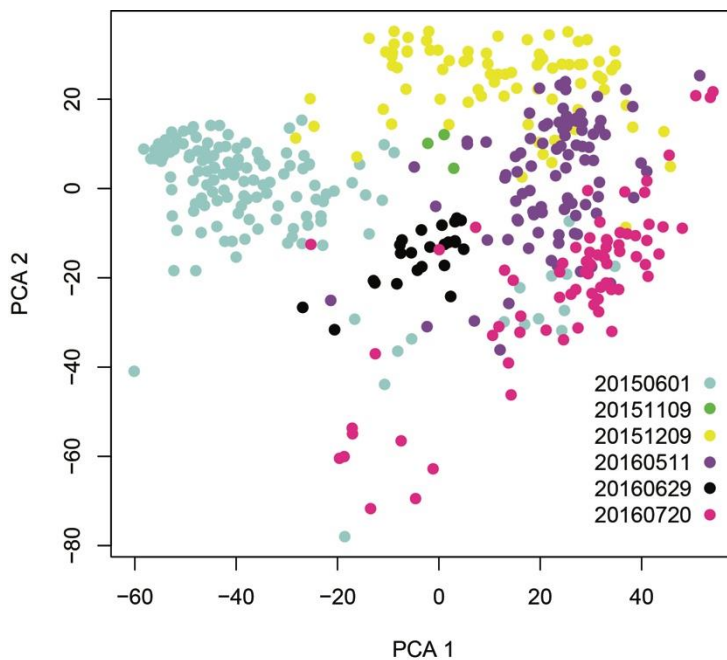

163  
164  
165  
166  
167



168 **Supplementary note 3: Comparison of estimated plasma concentration and frequency**

169 We investigated the relation between the frequency of occurrence of 1313 proteins in untreated plasma  
170 (**Supplementary Figure 3A**) and heat-treated plasma (**Supplementary Figure 3B**) with the estimated  
171 plasma concentration from PeptideAtlas. There was a significant association ( $p$ -value  $< 2.2e-16$ ) for  
172 both sample types while 293/1313 = 22% of the proteins (blue dots) were not found with a  
173 concentration estimation in PeptideAtlas.

174 **Supplementary Figure 3 A:** Relation between estimated plasma concentration [ng/ml] and  
175 frequency [%] for untreated plasma

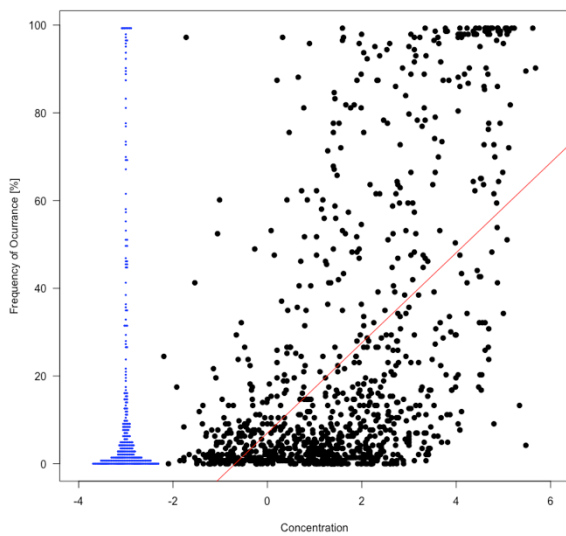

176

177 **Supplementary Figure 3 B:** Relation between estimated plasma concentration [ng/ml] and  
178 frequency [%] for heat-treated plasma.

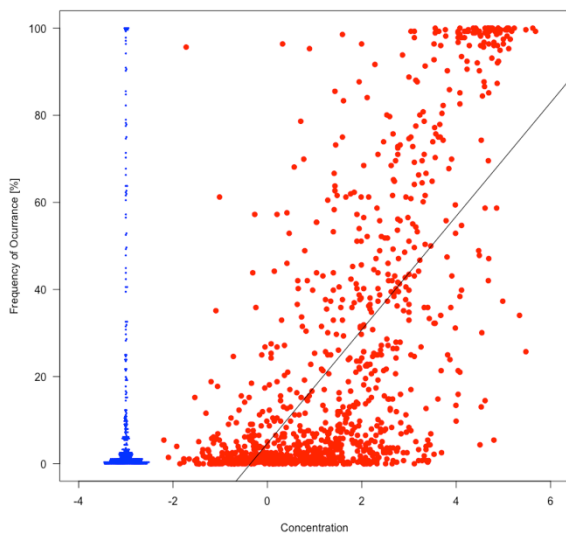

179

180

181

#### 182 **Supplementary note 4: Investigation of passenger proteins**

183 We determined possible presence of antigens in the antibody solution. Antigens that were used during  
184 the affinity purification may have been co-eluted. Each antigen, denoted PrEST, consists of a tag (His<sub>6</sub>  
185 and albumin binding protein ABP) and the region selected target protein [18]. To detect the presence  
186 of the antigens, we chose an antibody specific to tag region (1:60,000; [19]) and incubated antibody-  
187 coupled beads accordingly. Detection using an anti-IgY antibody carrying R-PE (1 µg/ml) we  
188 determined the cut-off as 10x SD + mean MFI obtained from beads carrying normal rabbit IgG. Out of  
189 4,180 antibodies tested (See Supplementary Figure 4), 41 had been investigated for IP-MS. Among  
190 these, 11 revealed MFI above cut-off (135 AU). These included on binder of the ON-target category  
191 (HPA042270), nine CO-target binders (HPA002869, HPA005905, HPA019493, HPA030603,  
192 HPA045140, HPA045822, HPA062231, HPA067590, HPA070841) and one OFF-target binder  
193 (HPA057179).

194

195 **Supplementary Figure 6:** Ranked distribution of the detection of passenger antigens on  
196 antibody coupled beads.

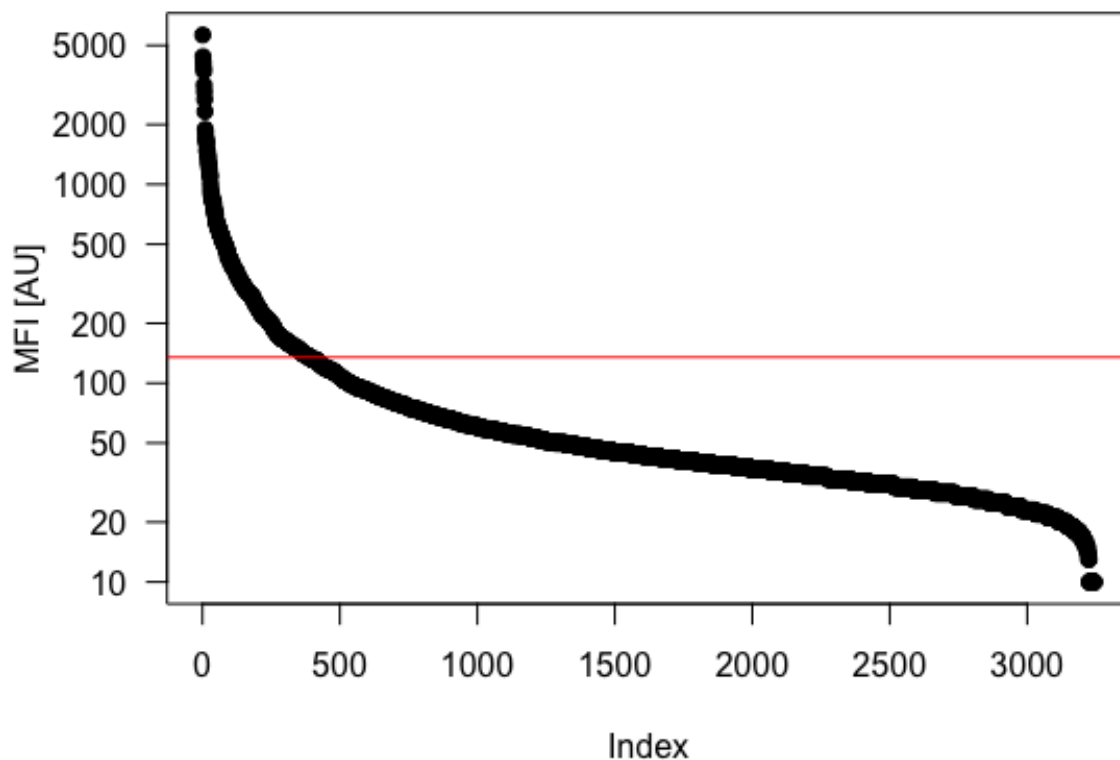

197

198 **Supplementary note 5: Antibodies evaluation by protein arrays, WB and pIP.**

199 In plasma proteomics, current options for assessing the selectivity of antibodies can be offered by  
200 paired antibodies, protein arrays [20] or Western blot (WB) [21]. Even if the three methods are each  
201 valuable in evaluating antibodies quality, validation of a previous discovery or qualification prior to a  
202 planned assay should be performed by a method resembling as much as possible the experimental  
203 conditions of the previous or intended application.

204 For both protein arrays and WB, the setup is that a surplus of antibodies is diluted in a solution and  
205 applied onto supports that present the antigens. Hence, there is generally minimal competition for  
206 binding sites between potential on- and off-targets as compared to antibodies being immobilized and  
207 applied to a complex solution. For an example given by anti-IL6R binder, we found application  
208 dependent recognition for five different antibodies. All five were classified as target-specific using  
209 protein arrays, however only three detected IL6R in plasma (**Supplementary Excel Table**). It is  
210 consequently the composition of plasma, where 90% of protein content is assigned to 20 proteins, that  
211 poses a challenge for WB in terms of analytical resolution. In samples in which the concentrations of  
212 certain proteins dominate, the efficiency of how proteins migrate through the gel can be affected. This  
213 can influence the distribution of proteins in terms of their molecular mass and abundance; hence limits  
214 the amount of plasma loaded on the gel and so detectability of less abundant targets.

215 As first, we compared the classifications obtained here with existing scores of validation assigned by  
216 plasma WB to the same antibody's Lot (HPA ID) within the Human Protein Atlas project [21].  
217 Noteworthy, the comparison is based on different samples and the samples chosen for WB analysis  
218 were depleted of albumin and IgG prior use [22]. Nevertheless, we found that the assessment of 13 out  
219 of 104 antibodies (12%) provided supportive evidence by both methods. For antibodies raised against  
220 plasma proteins, the success rates for plasma IP (54%) was though higher than for plasma WB (32%)  
221 (**Supplementary Table 1**). When considering cellular proteins, the success rates were the same 33%.  
222 For WB however, uncertainty will remain unless other standards or comparative analyses are used to  
223 reference the detected bands. Until then, bands detected at the predicted molecular weight may still  
224 represent the recognition of an off-target molecule.

225 Consequently, pIP provides an unequivocal identification of the target and could elucidate ambiguous  
226 WB results (see C1orf64, CEP162, E2F7, and CCL16 **Supplementary Excel Table**, sheet:  
227 "Antibodies\_experim\_annotation"). While WB may provide a more accessible technology for some  
228 labs, the information added by identification in MS will be required for an in-depth analysis of  
229 antibody selectivity. IP-MS can here be one option to enhance our understanding of binding to  
230 proteins, in particular for plasma.

231

232 **Supplementary Table 1.** Comparison of validation rate by pIPs and WB for 104 antibodies  
 233 assessed previously in plasma by WB. An antibody was considered passed by WB if scored  
 234 1,2 or 3, according to the Human Protein Atlas project.  
 235

| <b>Method</b>               | <b>Plasma</b>             | <b>Cellular</b> | <b>Sum</b> |
|-----------------------------|---------------------------|-----------------|------------|
|                             | <b>(MS)/Extracellular</b> |                 |            |
|                             | N (%)                     | N (%)           | N (%)      |
| <b>Pass by pIPs + WB*</b>   | 11 (19)                   | 2 (4)           | 13 (13)    |
| <b>Pass only by WB</b>      | 8 (13)                    | 13 (29)         | 20(20)     |
| <b>Pass only by pIPs</b>    | 21(35)                    | 13 (29)         | 34 (33)    |
| <b>WB (Total)</b>           | 19 (32)                   | 15 (33)         |            |
| <b>pIPs (Total)</b>         | 32 (54)                   | 15 (33)         |            |
| <b>Failed by pIPs + WB*</b> | 19 (33)                   | 17 (38)         | 36 (35)    |
| <b>Total*</b>               | 59 (100)                  | 45 (100)        | 104 (100)  |

236

237

238 **Supplementary note 7: Interaction and homology analysis**

239 **Supplementary Figure 7A:** Interaction networks of CCL16 and CCL18 taken from String  
 240 database V10.5 (20 interactors, 1<sup>st</sup> shell only).

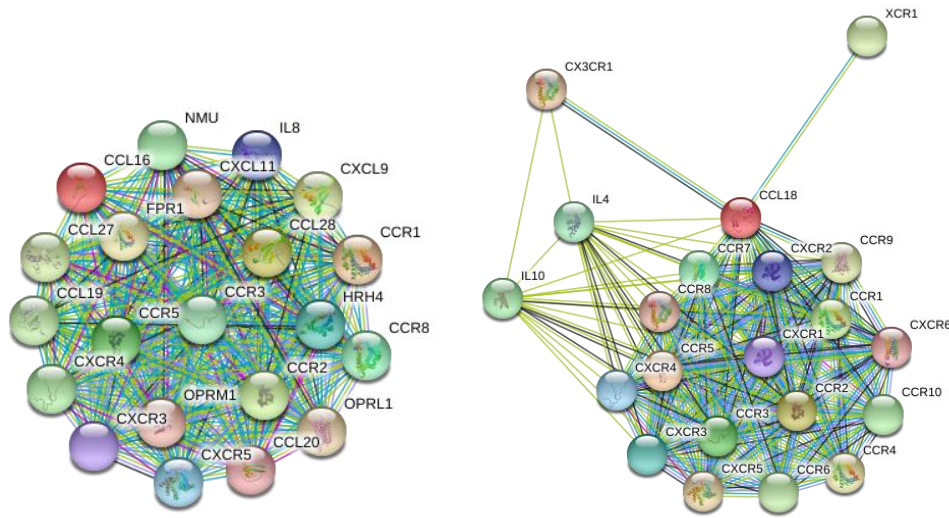

241  
 242

243 **Supplementary Figure 7B:** Sequence homology search of CCL16-CCL18 using CLUSTALO  
 244 alignment revealed a 26.6% homology. In Yellow: Amino acidic sequence used as antigen in  
 245 the generation of the antibody.

```

CLUSTAL O(1.2.3) multiple sequence alignment

SP|O15467|CCL16_HUMAN MKVSEAAALLVLLIILITTSASRSQPKVPEWVNTPSTCCLKYEKVLPRLVVGYRK-ALN 59
SP|P55774|CCL18_HUMAN MKGLAAA--LLVLVCTMALC-----SCAQVGTNKELCCLVYTSWQIPQKFIVDYSETSPQ 53
**  **  ****:  ::  .  .  :  ..  .  *** *  .  :*:::*:*  :  :

SP|O15467|CCL16_HUMAN CHLPATIFVTKRNREVCTNPNDWVQVEYIKDPNLPPLPTRLNSTVKIITAKNGQPQLLNS 119
SP|P55774|CCL18_HUMAN CPKPGVILLTKRGRQICADPNKQWVQKYISDLKLN----- 89
*  *  .:.*:.*:.*:.*:.*:.*:.*:.*:.*:.*:.*:.*:.*:.*:.*:.*:.*:.*:.*:.*:.*:.*:
    
```

246 SP|O15467|CCL16\_HUMAN Q 120  
 247 SP|P55774|CCL18\_HUMAN -

247  
 248







265 **SUPPLEMENTARY EXCEL TABLE**

266

267 **Description of content of each Sheet.**

- 268 • “Selected targets”: Description of proteins for which antibodies were selected. (See  
269 Supplementary References 23-108)
- 270 • “Protein Annotation (GO)”: Protein annotation using GO terms.
- 271 • “Antibodies experim. annotations”: Antibodies used in the study, annotations about  
272 experimental conditions and data of validation by pIP and WB
- 273 • “Frequencies of identification”: List of proteins identified in pIP experiments and their  
274 frequencies of identification in heat treated or not heat treated plasma.
- 275 • “Batches Kruskal Wallis Test”: p-values for differences in intensity levels detected the  
276 between batches
- 277 • “Go enrichment analysis”: Differential GO analysis using TOPP cluster between frequent (>  
278 20%) and less frequently occurring proteins (< 20%).
- 279 • “z-score >2.5”: List proteins for which a z-score > 2.5 was calculated containing targets, off-  
280 targets and potential interactors.
- 281 • “List of Peptides”: Peptides identified in pIP assays for the expected target proteins and  
282 overlapping with the antigen used to generate the antibodies.
- 283 • “Experimental Batches”: description of major differences in the experimental conditions for  
284 the 6 experimental batches analyzed.
- 285 • “Reagents Catalogs\_Lot\_numbers”: List of catalog and lot numbers for affinity reagents.
- 286 • “Antibodies against same protein”: proteins enriched by antibodies raised against the same  
287 target protein, using same or different protein fragments.

288

289



## 290 SUPPLEMENTARY REFERENCES

- 291 1. Schwenk JM, Omenn GS, Sun Z, Campbell DS, Baker MS, Overall CM, et al. The  
292 Human Plasma Proteome Draft of 2017: Building on the Human Plasma PeptideAtlas from Mass  
293 Spectrometry and Complementary Assays. *J Proteome Res.* 2017. doi:  
294 10.1021/acs.jproteome.7b00467. PubMed PMID: 28938075.
- 295 2. Uhlen M, Fagerberg L, Hallstrom BM, Lindskog C, Oksvold P, Mardinoglu A, et al.  
296 Proteomics. Tissue-based map of the human proteome. *Science.* 2015;347(6220):1260419. doi:  
297 10.1126/science.1260419. PubMed PMID: 25613900.
- 298 3. Neiman M, Fredolini C, Johansson H, Lehtio J, Nygren PA, Uhlen M, et al. Selectivity  
299 analysis of single binder assays used in plasma protein profiling. *Proteomics.* 2013;13(23-24):3406-10.  
300 doi: 10.1002/pmic.201300030. PubMed PMID: 24151238; PubMed Central PMCID:  
301 PMCPMC4265267.
- 302 4. Cox J, Mann M. MaxQuant enables high peptide identification rates, individualized  
303 p.p.b.-range mass accuracies and proteome-wide protein quantification. *Nat Biotechnol.*  
304 2008;26(12):1367-72. Epub 2008/11/26. doi: nbt.1511 [pii]  
305 10.1038/nbt.1511. PubMed PMID: 19029910.
- 306 5. Lazar C, Gatto L, Ferro M, Bruley C, Burger T. Accounting for the Multiple Natures of  
307 Missing Values in Label-Free Quantitative Proteomics Data Sets to Compare Imputation Strategies. *J*  
308 *Proteome Res.* 2016;15(4):1116-25. Epub 2016/03/01. doi: 10.1021/acs.jproteome.5b00981. PubMed  
309 PMID: 26906401.
- 310 6. Ihaka R, Gentleman R. R: a language for data analysis and graphics. *Journal of*  
311 *Computational and Graphical Statistics.* 1996;5:299-3214.
- 312 7. Sievers F, Wilm A, Dineen D, Gibson TJ, Karplus K, Li W, et al. Fast, scalable  
313 generation of high-quality protein multiple sequence alignments using Clustal Omega. *Mol Syst Biol.*  
314 2011;7:539. Epub 2011/10/11. doi: 10.1038/msb.2011.75. PubMed PMID: 21988835; PubMed  
315 Central PMCID: PMCPMC3261699.
- 316 8. Kaimal V, Bardes EE, Tabar SC, Jegga AG, Aronow BJ. ToppCluster: a multiple gene  
317 list feature analyzer for comparative enrichment clustering and network-based dissection of biological  
318 systems. *Nucleic Acids Res.* 2010;38(Web Server issue):W96-102. doi: 10.1093/nar/gkq418. PubMed  
319 PMID: 20484371; PubMed Central PMCID: PMCPMC2896202.
- 320 9. Drobin K, Nilsson P, Schwenk JM. Highly multiplexed antibody suspension bead  
321 arrays for plasma protein profiling. *Methods Mol Biol.* 2013;1023:137-45. doi: 10.1007/978-1-4614-  
322 7209-4\_8. PubMed PMID: 23765623.
- 323 10. Dezfouli M, Vickovic S, Iglesias MJ, Nilsson P, Schwenk JM, Ahmadian A. Magnetic  
324 bead assisted labeling of antibodies at nanogram scale. *Proteomics.* 2014;14(1):14-8. Epub  
325 2013/12/04. doi: 10.1002/pmic.201300283. PubMed PMID: 24307663.

- 326 11. Tamilselvi E, HariPriya D, Hemamalini M, Pushpa G, Swapna S. Association of disease  
327 severity with IL-1 levels in methotrexate-treated psoriasis patients. *Scand J Immunol.* 2013;78(6):545-  
328 53. doi: 10.1111/sji.12117. PubMed PMID: 24283773.
- 329 12. Borte S, von Döbeln U, Fasth A, Wang N, Janzi M, Winiarski J, et al. Neonatal  
330 screening for severe primary immunodeficiency diseases using high-throughput triplex real-time PCR.  
331 *Blood.* 2012;119(11):2552-5. Epub 2011/11/30. doi: 10.1182/blood-2011-08-371021. PubMed PMID:  
332 22130802.
- 333 13. Lilja H, Ulmert D, Vickers AJ. Prostate-specific antigen and prostate cancer: prediction,  
334 detection and monitoring. *Nat Rev Cancer.* 2008;8(4):268-78. doi: 10.1038/nrc2351. PubMed PMID:  
335 18337732.
- 336 14. Stowe RP, Peek MK, Cutchin MP, Goodwin JS. Plasma cytokine levels in a population-  
337 based study: relation to age and ethnicity. *J Gerontol A Biol Sci Med Sci.* 2010;65(4):429-33. Epub  
338 2009/12/16. doi: 10.1093/gerona/glp198. PubMed PMID: 20018825; PubMed Central PMCID:  
339 PMCPMC2844059.
- 340 15. Del Valle-Pinero AY, Martino AC, Taylor TJ, Majors BL, Patel NS, Heitkemper MM,  
341 et al. Pro-inflammatory chemokine C-C motif ligand 16 (CCL-16) dysregulation in irritable bowel  
342 syndrome (IBS): a pilot study. *Neurogastroenterology and motility : the official journal of the*  
343 *European Gastrointestinal Motility Society.* 2011;23(12):1092-7. doi: 10.1111/j.1365-  
344 2982.2011.01792.x. PubMed PMID: 21951809; PubMed Central PMCID: PMC3557463.
- 345 16. Luc G, Bard JM, Lesueur C, Arveiler D, Evans A, Amouyel P, et al. Plasma cystatin-C  
346 and development of coronary heart disease: The PRIME Study. *Atherosclerosis.* 2006;185(2):375-80.  
347 Epub 2005/07/25. doi: 10.1016/j.atherosclerosis.2005.06.017. PubMed PMID: 16046222.
- 348 17. Murase K, Mori K, Yoshimura C, Aihara K, Chihara Y, Azuma M, et al. Association  
349 between plasma neutrophil gelatinase associated lipocalin level and obstructive sleep apnea or  
350 nocturnal intermittent hypoxia. *PLoS One.* 2013;8(1):e54184. doi: 10.1371/journal.pone.0054184.  
351 PubMed PMID: 23342100; PubMed Central PMCID: PMC3544801.
- 352 18. Nilsson P, Paavilainen L, Larsson K, Odling J, Sundberg M, Andersson AC, et al.  
353 Towards a human proteome atlas: high-throughput generation of mono-specific antibodies for tissue  
354 profiling. *Proteomics.* 2005;5(17):4327-37. PubMed PMID: 16237735.
- 355 19. Schwenk JM, Lindberg J, Sundberg M, Uhlen M, Nilsson P. Determination of binding  
356 specificities in highly multiplexed bead-based assays for antibody proteomics. *Mol Cell Proteomics.*  
357 2007;6(1):125-32. doi: 10.1074/mcp.T600035-MCP200. PubMed PMID: 17060675.
- 358 20. Sjöberg R, Mattsson C, Andersson E, Hellström C, Uhlen M, Schwenk JM, et al.  
359 Exploration of high-density protein microarrays for antibody validation and autoimmunity profiling. *N*  
360 *Biotechnol.* 2016;33(5 Pt A):582-92. Epub 2015/09/28. doi: 10.1016/j.nbt.2015.09.002. PubMed  
361 PMID: 26417875.

- 362 21. Algenas C, Agaton C, Fagerberg L, Asplund A, Bjorling L, Bjorling E, et al. Antibody  
363 performance in western blot applications is context-dependent. *Biotechnol J*. 2014;9(3):435-45. doi:  
364 10.1002/biot.201300341. PubMed PMID: 24403002.
- 365 22. Eriksson C, Schwenk JM, Sjoberg A, Hober S. Affibody molecule-mediated depletion  
366 of HSA and IgG using different buffer compositions: a 15 min protocol for parallel processing of 1-48  
367 samples. *Biotechnol Appl Biochem*. 2010;56(2):49-57. doi: 10.1042/BA20100041. PubMed PMID:  
368 20446920.
- 369 23. Sosonkina N, Nakashima M, Ohta T, Niikawa N, Starenki D. Down-regulation of  
370 ABCC11 protein (MRP8) in human breast cancer. *Exp Oncol*. 2011;33(1):42-6. PubMed PMID:  
371 21423094.
- 372 24. Khwairakpam AD, Shyamananda MS, Sailo BL, Rathnakaram SR, Padmavathi G,  
373 Kotoky J, et al. ATP citrate lyase (ACLY): a promising target for cancer prevention and treatment.  
374 *Curr Drug Targets*. 2015;16(2):156-63. PubMed PMID: 25537655.
- 375 25. Bjørklund SS, Kristensen VN, Seiler M, Kumar S, Alnæs GI, Ming Y, et al. Expression  
376 of an estrogen-regulated variant transcript of the peroxisomal branched chain fatty acid oxidase  
377 ACOX2 in breast carcinomas. *BMC Cancer*. 2015;15:524. Epub 2015/07/17. doi: 10.1186/s12885-  
378 015-1510-8. PubMed PMID: 26183823; PubMed Central PMCID: PMC4504068.
- 379 26. Jacques J, Hotton D, Asselin A, De la Dure-Molla M, Coudert AE, Isaac J, et al.  
380 Ameloblastin as a putative marker of specific bone compartments. *Connect Tissue Res*. 2014;55 Suppl  
381 1:117-20. doi: 10.3109/03008207.2014.923849. PubMed PMID: 25158194.
- 382 27. Liu Z, Lu H, Jiang Z, Pastuszyn A, Hu CA. Apolipoprotein I6, a novel proapoptotic  
383 Bcl-2 homology 3-only protein, induces mitochondria-mediated apoptosis in cancer cells. *Mol Cancer*  
384 *Res*. 2005;3(1):21-31. PubMed PMID: 15671246.
- 385 28. You J, Yang H, Lai Y, Simon L, Au J, Burkart AL. ARID2, p110 $\alpha$ , p53, and  $\beta$ -catenin  
386 protein expression in hepatocellular carcinoma and clinicopathologic implications. *Hum Pathol*.  
387 2015;46(7):1068-77. PubMed PMID: 26284269.
- 388 29. Huang RY, Su SG, Wu DC, Fu J, Zeng X. BLZF1 expression is of prognostic  
389 significance in hepatocellular carcinoma. *Biochem Biophys Res Commun*. 2015;467(3):602-9. Epub  
390 2015/09/02. doi: 10.1016/j.bbrc.2015.08.119. PubMed PMID: 26342799.
- 391 30. Su D, Fu X, Fan S, Wu X, Wang XX, Fu L, et al. Role of ERRF, a novel ER-related  
392 nuclear factor, in the growth control of ER-positive human breast cancer cells. *Am J Pathol*.  
393 2012;180(3):1189-201. doi: 10.1016/j.ajpath.2011.11.025. PubMed PMID: 22341523; PubMed  
394 Central PMCID: PMC3349889.
- 395 31. Figueroa JE, Densen P. Infectious diseases associated with complement deficiencies.  
396 *Clin Microbiol Rev*. 1991;4(3):359-95. PubMed PMID: 1889047; PubMed Central PMCID:  
397 PMC358203.

- 398 32. Su DM, Zhang Q, Wang X, He P, Zhu YJ, Zhao J, et al. Two types of human malignant  
399 melanoma cell lines revealed by expression patterns of mitochondrial and survival-apoptosis genes:  
400 implications for malignant melanoma therapy. *Mol Cancer Ther.* 2009;8(5):1292-304. Epub  
401 2009/04/21. doi: 10.1158/1535-7163.MCT-08-1030. PubMed PMID: 19383853; PubMed Central  
402 PMCID: PMCPMC3128982.
- 403 33. Tian GA, Zhu CC, Zhang XX, Zhu L, Yang XM, Jiang SH, et al. CCBE1 promotes  
404 GIST development through enhancing angiogenesis and mediating resistance to imatinib. *Sci Rep.*  
405 2016;6:31071. Epub 2016/08/10. doi: 10.1038/srep31071. PubMed PMID: 27506146; PubMed  
406 Central PMCID: PMCPMC4978997.
- 407 34. Arakelyan A, Kriegova E, Kubistova Z, Mrazek F, Kverka M, du Bois RM, et al.  
408 Protein levels of CC chemokine ligand (CCL)15, CCL16 and macrophage stimulating protein in  
409 patients with sarcoidosis. *Clin Exp Immunol.* 2009;155(3):457-65. doi: 10.1111/j.1365-  
410 2249.2008.03832.x. PubMed PMID: 19220835; PubMed Central PMCID: PMCPMC2669522.
- 411 35. Shi L, Zhang B, Sun X, Zhang X, Lv S, Li H, et al. CC chemokine ligand 18(CCL18)  
412 promotes migration and invasion of lung cancer cells by binding to Nir1 through Nir1-  
413 ELMO1/DOC180 signaling pathway. *Mol Carcinog.* 2016;55(12):2051-62. Epub 2016/01/12. doi:  
414 10.1002/mc.22450. PubMed PMID: 26756176.
- 415 36. Radulovich N, Pham NA, Strumpf D, Leung L, Xie W, Jurisica I, et al. Differential  
416 roles of cyclin D1 and D3 in pancreatic ductal adenocarcinoma. *Mol Cancer.* 2010;9:24. Epub  
417 2010/02/01. doi: 10.1186/1476-4598-9-24. PubMed PMID: 20113529; PubMed Central PMCID:  
418 PMCPMC2824633.
- 419 37. Li Y, Qu P, Wu L, Li B, Du H, Yan C. Atp6b/AIM/Spa/CD5L overexpression in  
420 alveolar type II epithelial cells induces spontaneous lung adenocarcinoma. *Cancer Res.*  
421 2011;71(16):5488-99. Epub 2011/06/22. doi: 10.1158/0008-5472.CAN-10-4225. PubMed PMID:  
422 21697282; PubMed Central PMCID: PMCPMC3156382.
- 423 38. Awata T, Yamashita H, Kurihara S, Morita-Ohkubo T, Miyashita Y, Katayama S, et al.  
424 A genome-wide association study for diabetic retinopathy in a Japanese population: potential  
425 association with a long intergenic non-coding RNA. *PLoS One.* 2014;9(11):e111715. Epub  
426 2014/11/03. doi: 10.1371/journal.pone.0111715. PubMed PMID: 25364816; PubMed Central PMCID:  
427 PMCPMC4218806.
- 428 39. Kalathas D, Theocharis DA, Bounias D, Kyriakopoulou D, Papageorgakopoulou N,  
429 Stavropoulos MS, et al. Chondroitin synthases I, II, III and chondroitin sulfate glucuronyltransferase  
430 expression in colorectal cancer. *Mol Med Rep.* 2011;4(2):363-8. Epub 2011/01/25. doi:  
431 10.3892/mmr.2011.431. PubMed PMID: 21468578.
- 432 40. Bernardo BC, Belluoccio D, Rowley L, Little CB, Hansen U, Bateman JF. Cartilage  
433 intermediate layer protein 2 (CILP-2) is expressed in articular and meniscal cartilage and down-

- 434 regulated in experimental osteoarthritis. *J Biol Chem.* 2011;286(43):37758-67. Epub 2011/08/31. doi:  
435 10.1074/jbc.M111.248039. PubMed PMID: 21880736; PubMed Central PMCID: PMCPMC3199518.
- 436 41. Shah SP, Morin RD, Khattra J, Prentice L, Pugh T, Burleigh A, et al. Mutational  
437 evolution in a lobular breast tumour profiled at single nucleotide resolution. *Nature.*  
438 2009;461(7265):809-13. doi: 10.1038/nature08489. PubMed PMID: 19812674.
- 439 42. Urbschat A, Obermüller N, Haferkamp A. Biomarkers of kidney injury. *Biomarkers.*  
440 2011;16 Suppl 1:S22-30. doi: 10.3109/1354750X.2011.587129. PubMed PMID: 21707441.
- 441 43. Maxwell PJ, Neisen J, Messenger J, Waugh DJ. Tumor-derived CXCL8 signaling  
442 augments stroma-derived CCL2-promoted proliferation and CXCL12-mediated invasion of PTEN-  
443 deficient prostate cancer cells. *Oncotarget.* 2014;5(13):4895-908. doi: 10.18632/oncotarget.2052.  
444 PubMed PMID: 24970800; PubMed Central PMCID: PMCPMC4148108.
- 445 44. Melén E, Himes BE, Brehm JM, Boutaoui N, Klanderman BJ, Sylvia JS, et al. Analyses  
446 of shared genetic factors between asthma and obesity in children. *J Allergy Clin Immunol.*  
447 2010;126(3):631-7.e1-8. doi: 10.1016/j.jaci.2010.06.030. PubMed PMID: 20816195; PubMed Central  
448 PMCID: PMCPMC2941152.
- 449 45. Chen WC, Chen MF, Lin PY. Significance of DNMT3b in oral cancer. *PLoS One.*  
450 2014;9(3):e89956. Epub 2014/03/13. doi: 10.1371/journal.pone.0089956. PubMed PMID: 24625449;  
451 PubMed Central PMCID: PMCPMC3953114.
- 452 46. Barber AG, Castillo-Martin M, Bonal DM, Rybicki BA, Christiano AM, Cordon-Cardo  
453 C. Characterization of desmoglein expression in the normal prostatic gland. Desmoglein 2 is an  
454 independent prognostic factor for aggressive prostate cancer. *PLoS One.* 2014;9(6):e98786. Epub  
455 2014/06/04. doi: 10.1371/journal.pone.0098786. PubMed PMID: 24896103; PubMed Central PMCID:  
456 PMCPMC4045811.
- 457 47. Chen X, Zhang Y, Shi Y, Lian H, Tu H, Han S, et al. MiR-129 triggers autophagic flux  
458 by regulating a novel Notch-1/ E2F7/Beclin-1 axis to impair the viability of human malignant glioma  
459 cells. *Oncotarget.* 2016;7(8):9222-35. doi: 10.18632/oncotarget.7003. PubMed PMID: 26824182;  
460 PubMed Central PMCID: PMCPMC4891036.
- 461 48. Chen J, Wei D, Zhao Y, Liu X, Zhang J. Overexpression of EFEMP1 correlates with  
462 tumor progression and poor prognosis in human ovarian carcinoma. *PLoS One.* 2013;8(11):e78783.  
463 Epub 2013/11/13. doi: 10.1371/journal.pone.0078783. PubMed PMID: 24236050; PubMed Central  
464 PMCID: PMCPMC3827232.
- 465 49. de Nigris F, Mega T, Berger N, Barone MV, Santoro M, Viglietto G, et al. Induction of  
466 ETS-1 and ETS-2 transcription factors is required for thyroid cell transformation. *Cancer Res.*  
467 2001;61(5):2267-75. PubMed PMID: 11280797.
- 468 50. Komatsu H, Masuda T, Iguchi T, Nambara S, Sato K, Hu Q, et al. Clinical Significance  
469 of FANCD2 Gene Expression and its Association with Tumor Progression in Hepatocellular

- 470 Carcinoma. *Anticancer Res.* 2017;37(3):1083-90. doi: 10.21873/anticancer.11420. PubMed PMID:  
471 28314268.
- 472 51. Cheng M, Watson PH, Paterson JA, Seidah N, Chretien M, Shiu RP. Pro-protein  
473 convertase gene expression in human breast cancer. *Int J Cancer.* 1997;71(6):966-71. PubMed PMID:  
474 9185698.
- 475 52. Ertao Z, Jianhui C, Chuangqi C, Changjiang Q, Sile C, Yulong H, et al. Low level of  
476 FOXL1 indicates a worse prognosis for gastric cancer patients. *Tumour Biol.* 2016;37(8):11331-7.  
477 Epub 2016/03/09. doi: 10.1007/s13277-016-4890-8. PubMed PMID: 26960689.
- 478 53. Ranta N, Turpeinen H, Oksanen A, Hämäläinen S, Huttunen R, Uusitalo-Seppälä R, et  
479 al. The Plasma Level of Proprotein Convertase FURIN in Patients with Suspected Infection in the  
480 Emergency Room: A Prospective Cohort Study. *Scand J Immunol.* 2015;82(6):539-46. doi:  
481 10.1111/sji.12386. PubMed PMID: 26346780.
- 482 54. Ko SY, Naora H. HOXA9 promotes homotypic and heterotypic cell interactions that  
483 facilitate ovarian cancer dissemination via its induction of P-cadherin. *Mol Cancer.* 2014;13:170. Epub  
484 2014/07/14. doi: 10.1186/1476-4598-13-170. PubMed PMID: 25023983; PubMed Central PMCID:  
485 PMC4105245.
- 486 55. Denduluri SK, Idowu O, Wang Z, Liao Z, Yan Z, Mohammed MK, et al. Insulin-like  
487 growth factor (IGF) signaling in tumorigenesis and the development of cancer drug resistance. *Genes*  
488 *Dis.* 2015;2(1):13-25. doi: 10.1016/j.gendis.2014.10.004. PubMed PMID: 25984556; PubMed Central  
489 PMCID: PMC4431759.
- 490 56. Cao Y, Nimptsch K, Shui IM, Platz EA, Wu K, Pollak MN, et al. Prediagnostic plasma  
491 IGFBP-1, IGF-1 and risk of prostate cancer. *Int J Cancer.* 2015;136(10):2418-26. Epub 2014/11/10.  
492 doi: 10.1002/ijc.29295. PubMed PMID: 25348852; PubMed Central PMCID: PMC4360136.
- 493 57. Yau SW, Azar WJ, Sabin MA, Werther GA, Russo VC. IGFBP-2 - taking the lead in  
494 growth, metabolism and cancer. *J Cell Commun Signal.* 2015;9(2):125-42. Epub 2015/01/25. doi:  
495 10.1007/s12079-015-0261-2. PubMed PMID: 25617050; PubMed Central PMCID:  
496 PMC4458250.
- 497 58. Alizadeh AA, Bohen SP, Lossos C, Martinez-Climent JA, Ramos JC, Cubedo-Gil E, et  
498 al. Expression profiles of adult T-cell leukemia-lymphoma and associations with clinical responses to  
499 zidovudine and interferon alpha. *Leuk Lymphoma.* 2010;51(7):1200-16. doi:  
500 10.3109/10428191003728628. PubMed PMID: 20370541; PubMed Central PMCID:  
501 PMC4296320.
- 502 59. Bankaitis KV, Fingleton B. Targeting IL4/IL4R for the treatment of epithelial cancer  
503 metastasis. *Clin Exp Metastasis.* 2015;32(8):847-56. Epub 2015/09/18. doi: 10.1007/s10585-015-  
504 9747-9. PubMed PMID: 26385103; PubMed Central PMCID: PMC4651701.



- 505 60. Kumari N, Dwarakanath BS, Das A, Bhatt AN. Role of interleukin-6 in cancer  
506 progression and therapeutic resistance. *Tumour Biol.* 2016;37(9):11553-72. Epub 2016/06/03. doi:  
507 10.1007/s13277-016-5098-7. PubMed PMID: 27260630.
- 508 61. Miller MA, Sullivan RJ, Lauffenburger DA. Molecular Pathways: Receptor  
509 Ectodomain Shedding in Treatment, Resistance, and Monitoring of Cancer. *Clin Cancer Res.*  
510 2017;23(3):623-9. Epub 2016/11/28. doi: 10.1158/1078-0432.CCR-16-0869. PubMed PMID:  
511 27895032; PubMed Central PMCID: PMC5290119.
- 512 62. Garaud S, Willard-Gallo K. IRF5: a rheostat for tumor-infiltrating lymphocyte  
513 trafficking in breast cancer? *Immunol Cell Biol.* 2015;93(5):425-6. doi: 10.1038/icc.2015.39. PubMed  
514 PMID: 26010613.
- 515 63. Moore KM, Thomas GJ, Duffy SW, Warwick J, Gabe R, Chou P, et al. Therapeutic  
516 targeting of integrin  $\alpha\beta 6$  in breast cancer. *J Natl Cancer Inst.* 2014;106(8). Epub 2014/06/28. doi:  
517 10.1093/jnci/dju169. PubMed PMID: 24974129; PubMed Central PMCID: PMC4151855.
- 518 64. Coustan-Smith E, Song G, Clark C, Key L, Liu P, Mehrpooya M, et al. New markers  
519 for minimal residual disease detection in acute lymphoblastic leukemia. *Blood.* 2011;117(23):6267-76.  
520 Epub 2011/04/12. doi: 10.1182/blood-2010-12-324004. PubMed PMID: 21487112; PubMed Central  
521 PMCID: PMC3122946.
- 522 65. Ferreyra Solari NE, Belforte FS, Canedo L, Videla-Richardson GA, Espinosa JM, Rossi  
523 M, et al. The NSL Chromatin-Modifying Complex Subunit KANSL2 Regulates Cancer Stem-like  
524 Properties in Glioblastoma That Contribute to Tumorigenesis. *Cancer Res.* 2016;76(18):5383-94.  
525 Epub 2016/07/12. doi: 10.1158/0008-5472.CAN-15-3159. PubMed PMID: 27406830; PubMed  
526 Central PMCID: PMC5026635.
- 527 66. Abella V, Scotece M, Conde J, Gómez R, Lois A, Pino J, et al. The potential of  
528 lipocalin-2/NGAL as biomarker for inflammatory and metabolic diseases. *Biomarkers.*  
529 2015;20(8):565-71. Epub 2015/12/15. doi: 10.3109/1354750X.2015.1123354. PubMed PMID:  
530 26671823; PubMed Central PMCID: PMC4819811.
- 531 67. Koide N, Kasamatsu A, Endo-Sakamoto Y, Ishida S, Shimizu T, Kimura Y, et al.  
532 Evidence for Critical Role of Lymphocyte Cytosolic Protein 1 in Oral Cancer. *Sci Rep.* 2017;7:43379.  
533 Epub 2017/02/23. doi: 10.1038/srep43379. PubMed PMID: 28230172; PubMed Central PMCID:  
534 PMC5322526.
- 535 68. Manier S, Powers JT, Sacco A, Glavey SV, Huynh D, Reagan MR, et al. The  
536 LIN28B/let-7 axis is a novel therapeutic pathway in multiple myeloma. *Leukemia.* 2017;31(4):853-60.  
537 Epub 2016/10/24. doi: 10.1038/leu.2016.296. PubMed PMID: 27773931; PubMed Central PMCID:  
538 PMC5382134.
- 539 69. Wang Y, Shan Q, Hou G, Zhang J, Bai J, Lv X, et al. Discovery of potential colorectal  
540 cancer serum biomarkers through quantitative proteomics on the colonic tissue interstitial fluids from

- 541 the AOM-DSS mouse model. *J Proteomics*. 2016;132:31-40. Epub 2015/11/12. doi:  
542 10.1016/j.jprot.2015.11.013. PubMed PMID: 26581642.
- 543 70. Radon TP, Massat NJ, Jones R, Alrawashdeh W, Dumartin L, Ennis D, et al.  
544 Identification of a Three-Biomarker Panel in Urine for Early Detection of Pancreatic Adenocarcinoma.  
545 *Clin Cancer Res*. 2015;21(15):3512-21. doi: 10.1158/1078-0432.CCR-14-2467. PubMed PMID:  
546 26240291; PubMed Central PMCID: PMC4539580.
- 547 71. Rosas IO, Richards TJ, Konishi K, Zhang Y, Gibson K, Lokshin AE, et al. MMP1 and  
548 MMP7 as potential peripheral blood biomarkers in idiopathic pulmonary fibrosis. *PLoS Med*.  
549 2008;5(4):e93. doi: 10.1371/journal.pmed.0050093. PubMed PMID: 18447576; PubMed Central  
550 PMCID: PMC2346504.
- 551 72. Liguori L, Andolfo I, de Antonellis P, Aglio V, di Dato V, Marino N, et al. The  
552 metallophosphodiesterase *Mpp2* impairs tumorigenesis in neuroblastoma. *Cell Cycle*.  
553 2012;11(3):569-81. Epub 2012/02/01. doi: 10.4161/cc.11.3.19063. PubMed PMID: 22262177.
- 554 73. Sakata-Yanagimoto M, Chiba S. Notch2 and immune function. *Curr Top Microbiol*  
555 *Immunol*. 2012;360:151-61. doi: 10.1007/82\_2012\_235. PubMed PMID: 22695918.
- 556 74. Grandclement C, Borg C. Neuropilins: a new target for cancer therapy. *Cancers (Basel)*.  
557 2011;3(2):1899-928. Epub 2011/04/08. doi: 10.3390/cancers3021899. PubMed PMID: 24212788;  
558 PubMed Central PMCID: PMC3757396.
- 559 75. Lee DI, Zhu G, Sasaki T, Cho GS, Hamdani N, Holewinski R, et al. Phosphodiesterase  
560 9A controls nitric-oxide-independent cGMP and hypertrophic heart disease. *Nature*.  
561 2015;519(7544):472-6. Epub 2015/03/18. doi: 10.1038/nature14332. PubMed PMID: 25799991;  
562 PubMed Central PMCID: PMC4376609.
- 563 76. Ikenaga EH, Talib LL, Ferreira AS, Machado-Vieira R, Forlenza OV, Gattaz WF.  
564 Reduced activities of phospholipases A2 in platelets of drug-naïve bipolar disorder patients. *Bipolar*  
565 *Disord*. 2015;17(1):97-101. Epub 2014/07/08. doi: 10.1111/bdi.12229. PubMed PMID: 25041493.
- 566 77. Mealer RG, Murray AJ, Shahani N, Subramaniam S, Snyder SH. Rhes, a striatal-  
567 selective protein implicated in Huntington disease, binds beclin-1 and activates autophagy. *J Biol*  
568 *Chem*. 2014;289(6):3547-54. Epub 2013/12/09. doi: 10.1074/jbc.M113.536912. PubMed PMID:  
569 24324270; PubMed Central PMCID: PMC3916556.
- 570 78. Grawenda AM, O'Neill E. Clinical utility of RASSF1A methylation in human  
571 malignancies. *Br J Cancer*. 2015;113(3):372-81. Epub 2015/07/09. doi: 10.1038/bjc.2015.221.  
572 PubMed PMID: 26158424; PubMed Central PMCID: PMC4522630.
- 573 79. Yu J, Liang Q, Wang J, Wang K, Gao J, Zhang J, et al. REC8 functions as a tumor  
574 suppressor and is epigenetically downregulated in gastric cancer, especially in EBV-positive subtype.  
575 *Oncogene*. 2017;36(2):182-93. Epub 2016/05/23. doi: 10.1038/onc.2016.187. PubMed PMID:  
576 27212034; PubMed Central PMCID: PMC5241426.



- 577 80. Bystrom S, Fredolini C, Edqvist PH, Nyaiesh EN, Drobin K, Uhlen M, et al. Affinity  
578 Proteomics Exploration of Melanoma Identifies Proteins in Serum with Associations to T-Stage and  
579 Recurrence. *Translational oncology*. 2017;10(3):385-95. doi: 10.1016/j.tranon.2017.03.002. PubMed  
580 PMID: 28433799; PubMed Central PMCID: PMC5403766.
- 581 81. Strand AD, Aragaki AK, Shaw D, Bird T, Holton J, Turner C, et al. Gene expression in  
582 Huntington's disease skeletal muscle: a potential biomarker. *Hum Mol Genet*. 2005;14(13):1863-76.  
583 Epub 2005/05/11. doi: 10.1093/hmg/ddi192. PubMed PMID: 15888475.
- 584 82. Swart JF, de Roock S, Prakken BJ. Understanding inflammation in juvenile idiopathic  
585 arthritis: How immune biomarkers guide clinical strategies in the systemic onset subtype. *Eur J*  
586 *Immunol*. 2016;46(9):2068-77. doi: 10.1002/eji.201546092. PubMed PMID: 27461267.
- 587 83. Donato R, Sorci G, Giambanco I. S100A6 protein: functional roles. *Cell Mol Life Sci*.  
588 2017. Epub 2017/04/17. doi: 10.1007/s00018-017-2526-9. PubMed PMID: 28417162.
- 589 84. Lines KE, Chelala C, Dmitrovic B, Wijesuriya N, Kocher HM, Marshall JF, et al.  
590 S100P-binding protein, S100BP, mediates adhesion through regulation of cathepsin Z in pancreatic  
591 cancer cells. *Am J Pathol*. 2012;180(4):1485-94. Epub 2012/02/11. doi: 10.1016/j.ajpath.2011.12.031.  
592 PubMed PMID: 22330678.
- 593 85. Spiegel S, Milstien S. The outs and the ins of sphingosine-1-phosphate in immunity.  
594 *Nat Rev Immunol*. 2011;11(6):403-15. Epub 2011/05/06. doi: 10.1038/nri2974. PubMed PMID:  
595 21546914; PubMed Central PMCID: PMC3368251.
- 596 86. Richard S, Lagerstedt L, Burkhard PR, Debouverie M, Turck N, Sanchez JC. E-selectin  
597 and vascular cell adhesion molecule-1 as biomarkers of 3-month outcome in cerebrovascular diseases.  
598 *J Inflamm (Lond)*. 2015;12:61. Epub 2015/11/04. doi: 10.1186/s12950-015-0106-z. PubMed PMID:  
599 26543408; PubMed Central PMCID: PMC4634720.
- 600 87. Kumar P, Nandi S, Tan TZ, Ler SG, Chia KS, Lim WY, et al. Highly sensitive and  
601 specific novel biomarkers for the diagnosis of transitional bladder carcinoma. *Oncotarget*.  
602 2015;6(15):13539-49. doi: 10.18632/oncotarget.3841. PubMed PMID: 25915536; PubMed Central  
603 PMCID: PMC4537032.
- 604 88. Kim YI, Ahn JM, Sung HJ, Na SS, Hwang J, Kim Y, et al. Meta-markers for the  
605 differential diagnosis of lung cancer and lung disease. *J Proteomics*. 2016;148:36-43. Epub  
606 2016/05/07. doi: 10.1016/j.jprot.2016.04.052. PubMed PMID: 27168012.
- 607 89. Newbold RF, Mokbel K. Evidence for a tumour suppressor function of SETD2 in  
608 human breast cancer: a new hypothesis. *Anticancer Res*. 2010;30(9):3309-11. PubMed PMID:  
609 20944102.
- 610 90. Hsiao JH, Fu Y, Hill AF, Halliday GM, Kim WS. Elevation in sphingomyelin synthase  
611 activity is associated with increases in amyloid-beta peptide generation. *PLoS One*. 2013;8(8):e74016.  
612 Epub 2013/08/20. doi: 10.1371/journal.pone.0074016. PubMed PMID: 23977395; PubMed Central  
613 PMCID: PMC3748018.

- 614 91. Ahn R, Sabourin V, Bolt AM, Hébert S, Totten S, De Jay N, et al. The Shc1 adaptor  
615 simultaneously balances Stat1 and Stat3 activity to promote breast cancer immune suppression. *Nat*  
616 *Commun.* 2017;8:14638. Epub 2017/03/09. doi: 10.1038/ncomms14638. PubMed PMID: 28276425;  
617 PubMed Central PMCID: PMC5347092.
- 618 92. Urtasun R, Elizalde M, Azkona M, Latasa MU, García-Irigoyen O, Uriarte I, et al.  
619 Splicing regulator SLU7 preserves survival of hepatocellular carcinoma cells and other solid tumors  
620 via oncogenic miR-17-92 cluster expression. *Oncogene.* 2016;35(36):4719-29. Epub 2016/01/25. doi:  
621 10.1038/onc.2015.517. PubMed PMID: 26804174.
- 622 93. Wang Y, Wang H, Li L, Li J, Pan T, Zhang D, et al. Elevated expression of STIM1 is  
623 involved in lung tumorigenesis. *Oncotarget.* 2016;7(52):86584-93. doi: 10.18632/oncotarget.13359.  
624 PubMed PMID: 27863410; PubMed Central PMCID: PMC5349937.
- 625 94. Bhat R, Bhattacharyya PK, Ratech H. An Immunohistochemical Survey of SNARE  
626 Proteins Shows Distinct Patterns of Expression in Hematolymphoid Neoplasia. *Am J Clin Pathol.*  
627 2016;145(5):604-16. doi: 10.1093/ajcp/aqw022. PubMed PMID: 27247366.
- 628 95. Carozzo R, Dionisi-Vici C, Steuerwald U, Lucioli S, Deodato F, Di Giandomenico S,  
629 et al. SUCLA2 mutations are associated with mild methylmalonic aciduria, Leigh-like  
630 encephalomyopathy, dystonia and deafness. *Brain.* 2007;130(Pt 3):862-74. Epub 2007/02/14. doi:  
631 10.1093/brain/awl389. PubMed PMID: 17301081.
- 632 96. Tu H, Ahearn TU, Daniel CR, Gonzalez-Feliciano AG, Seabrook ME, Bostick RM.  
633 Transforming growth factors and receptor as potential modifiable pre-neoplastic biomarkers of risk for  
634 colorectal neoplasms. *Mol Carcinog.* 2015;54(9):821-30. Epub 2014/04/09. doi: 10.1002/mc.22152.  
635 PubMed PMID: 24719252.
- 636 97. Rios R, Sangro B, Herrero I, Quiroga J, Prieto J. The role of thrombopoietin in the  
637 thrombocytopenia of patients with liver cirrhosis. *Am J Gastroenterol.* 2005;100(6):1311-6. doi:  
638 10.1111/j.1572-0241.2005.41543.x. PubMed PMID: 15929762.
- 639 98. Meyer E, Michaelides M, Tee LJ, Robson AG, Rahman F, Pasha S, et al. Nonsense  
640 mutation in TMEM126A causing autosomal recessive optic atrophy and auditory neuropathy. *Mol*  
641 *Vis.* 2010;16:650-64. Epub 2010/04/13. PubMed PMID: 20405026; PubMed Central PMCID:  
642 PMC5347092.
- 643 99. O'Hurley G, Busch C, Fagerberg L, Hallstrom BM, Stadler C, Tolf A, et al. Analysis of  
644 the Human Prostate-Specific Proteome Defined by Transcriptomics and Antibody-Based Profiling  
645 Identifies TMEM79 and ACOXL as Two Putative, Diagnostic Markers in Prostate Cancer. *PLoS One.*  
646 2015;10(8):e0133449. doi: 10.1371/journal.pone.0133449. PubMed PMID: 26237329; PubMed  
647 Central PMCID: PMC4523174.
- 648 100. Liu Y, Jiang XL, Jiang DS, Zhang Y, Zhang R, Chen Y, et al. Toll-interacting protein  
649 (Tollip) negatively regulates pressure overload-induced ventricular hypertrophy in mice. *Cardiovasc*

- 650 Res. 2014;101(1):87-96. Epub 2013/11/26. doi: 10.1093/cvr/cvt232. PubMed PMID: 24285748;  
651 PubMed Central PMCID: PMCPMC3968303.
- 652 101. Feng Z, Prentice R, Srivastava S. Research issues and strategies for genomic and  
653 proteomic biomarker discovery and validation: a statistical perspective. *Pharmacogenomics*.  
654 2004;5(6):709-19. doi: 10.1517/14622416.5.6.709. PubMed PMID: 15335291.
- 655 102. Dias MS, Hamel CP, Meunier I, Varin J, Blanchard S, Boyard F, et al. Novel splice-site  
656 mutation in *TTL5* causes cone dystrophy in a consanguineous family. *Mol Vis*. 2017;23:131-9. Epub  
657 2017/03/18. PubMed PMID: 28356705; PubMed Central PMCID: PMCPMC5360453.
- 658 103. Ma Q, Li Y, Guo H, Li C, Chen J, Luo M, et al. A Novel Missense Mutation in *USP26*  
659 Gene Is Associated With Nonobstructive Azoospermia. *Reprod Sci*. 2016;23(10):1434-41. Epub  
660 2016/04/18. doi: 10.1177/1933719116641758. PubMed PMID: 27089915.
- 661 104. Gao Y, Wang Z, Hao Q, Li W, Xu Y, Zhang J, et al. Loss of  $ER\alpha$  induces amoeboid-  
662 like migration of breast cancer cells by downregulating vinculin. *Nat Commun*. 2017;8:14483. Epub  
663 2017/03/07. doi: 10.1038/ncomms14483. PubMed PMID: 28266545; PubMed Central PMCID:  
664 PMCPMC5344302.
- 665 105. Abdul S, Boender J, Malfliet JJ, Eikenboom J, Fijn van Draat K, Mauser-Bunschoten  
666 EP, et al. Plasma levels of plasminogen activator inhibitor-1 and bleeding phenotype in patients with  
667 von Willebrand disease. *Haemophilia*. 2017. Epub 2017/03/17. doi: 10.1111/hae.13206. PubMed  
668 PMID: 28306198.
- 669 106. Armaiz-Pena GN, Gonzalez-Villasana V, Nagaraja AS, Rodriguez-Aguayo C, Sadaoui  
670 NC, Stone RL, et al. Adrenergic regulation of monocyte chemotactic protein 1 leads to enhanced  
671 macrophage recruitment and ovarian carcinoma growth. *Oncotarget*. 2015;6(6):4266-73. doi:  
672 10.18632/oncotarget.2887. PubMed PMID: 25738355; PubMed Central PMCID: PMCPMC4414188.
- 673 107. Wang S, Reeves B, Pawlinski R. Astrocyte tissue factor controls CNS hemostasis and  
674 autoimmune inflammation. *Thromb Res*. 2016;141 Suppl 2:S65-7. doi: 10.1016/S0049-  
675 3848(16)30369-3. PubMed PMID: 27207429.
- 676 108. Di Paolo NC, Shayakhmetov DM. Interleukin  $1\alpha$  and the inflammatory process. *Nat*  
677 *Immunol*. 2016;17(8):906-13. doi: 10.1038/ni.3503. PubMed PMID: 27434011; PubMed Central  
678 PMCID: PMCPMC5152572.
- 679
